# Supplementary material for: Microbial Functional Capacity Is Preserved Within Engineered Soil Formulations Used In Mine Site Restoration
Source: PubMed Central journal article supplement (PMC5428872; doi:10.1038/s41598-017-00650-6), 2017-04-03
Supplement: 41598_2017_650_MOESM1_ESM.pdf [file 41598_2017_650_MOESM1_ESM.pdf]

## Supplementary information

# Microbial Functional Capacity Is Preserved Within Engineered Soil Formulations Used In Mine Site Restoration

Kumaresan D, Cross AC, Moreira-Grez B, Kariman K, Nevill P, Steven J, Allcock R, O'Donnell AG, Dixon KW and Whiteley AS

## Supplementary figure legends

Figure S1: Location of mine site and the adjacent reference site. The sampling locations for reference site samples are indicated with pins (different colours represent different transects).

Figure S2: Heat map comparing relative abundance of taxa (at the Order level) between different substrate blends and reference site samples. RS– Reference site samples; SB (100,50, 25 and 10) refers to different substrate blends. T0, T1 and T4 correspond to time zero, one week and four weeks after incubation.

Figure S3: Schematic representation of the dissimilarity percentages between reference site (RS) samples and different substrate blends (SB) based on similarity percentage (SIMPER) analysis of BAC composition (based at the level of Order). The width of the ribbon connecting two groups represents the percentage of dissimilarity.

Figure S4: Stacked bar chart representing the difference in taxa within all domains (at the phylum level) based on metagenome sequences (annotated using RefSeq database).

Figure S5 (a-j): Extended bar charts representing difference in proportion of taxa based on metagenome sequences (at order level and greater than 0.5%) that are significantly different (P-value > 0.05) between the groups (reference site and substrate blend samples). RS represents the soil samples from the reference site and SB (10, 25, 50 and 100) refers to different substrate blends.

Figure S6: Phylogenetic placement of 16S rRNA gene sequences that were assigned to the archaeal domain. Diameter of the blue circles represent the relative abundance of sequences placed in that particular position.

Figure S7: Principal co-ordinates plot based on metabolic gene profiles obtained from different metagenomes (at SEED subsystem Level 3). RS represents the soil samples from the reference site and SB (100, 50, 25 and 10) indicates different substrate blends.

Figure S8: Extended bar charts representing SEED subsystem categories (at level 1) that are significantly different (P-value > 0.05) between the groups (reference site and substrate blend samples). RS represents the soil samples from the reference site and SB (25, 50 and 100) refers to different substrate blends.

Fig S1

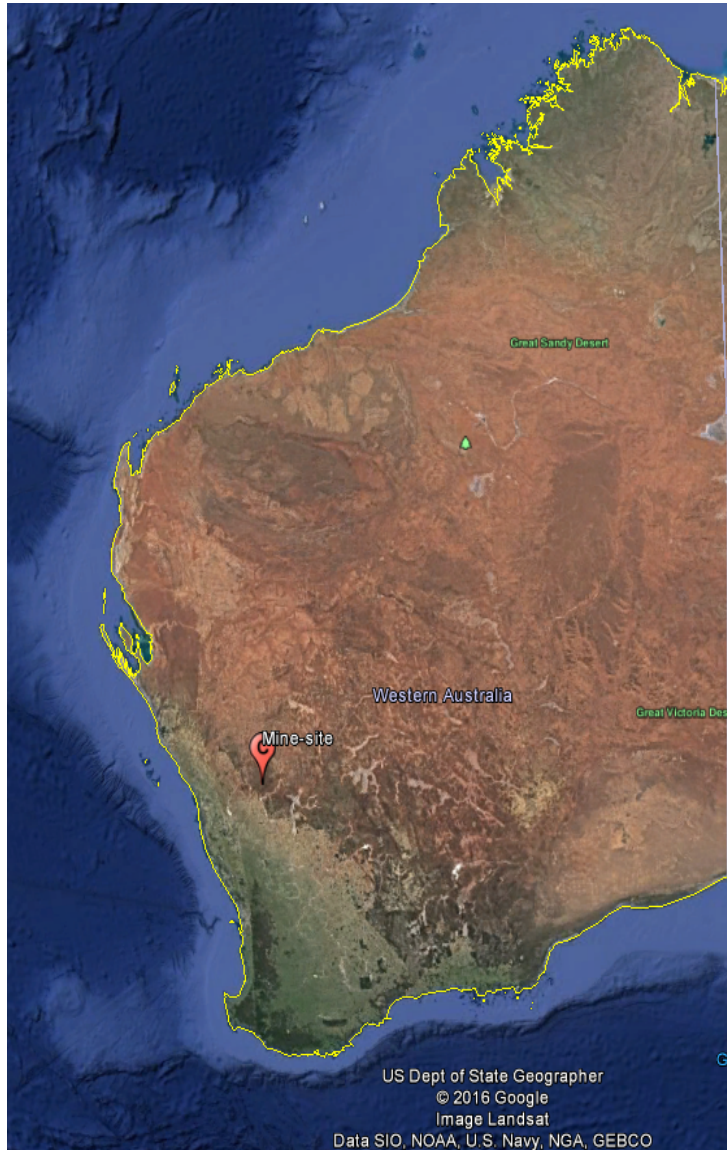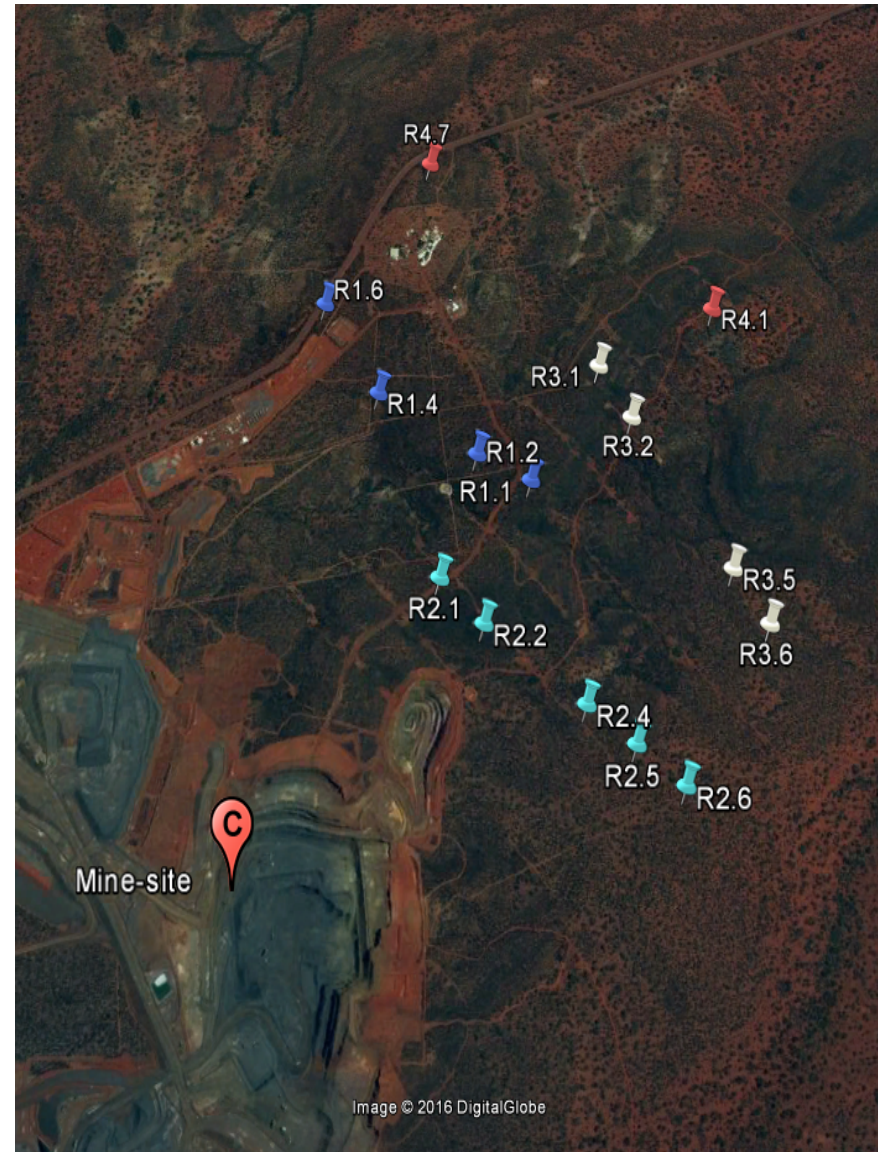

Fig S2

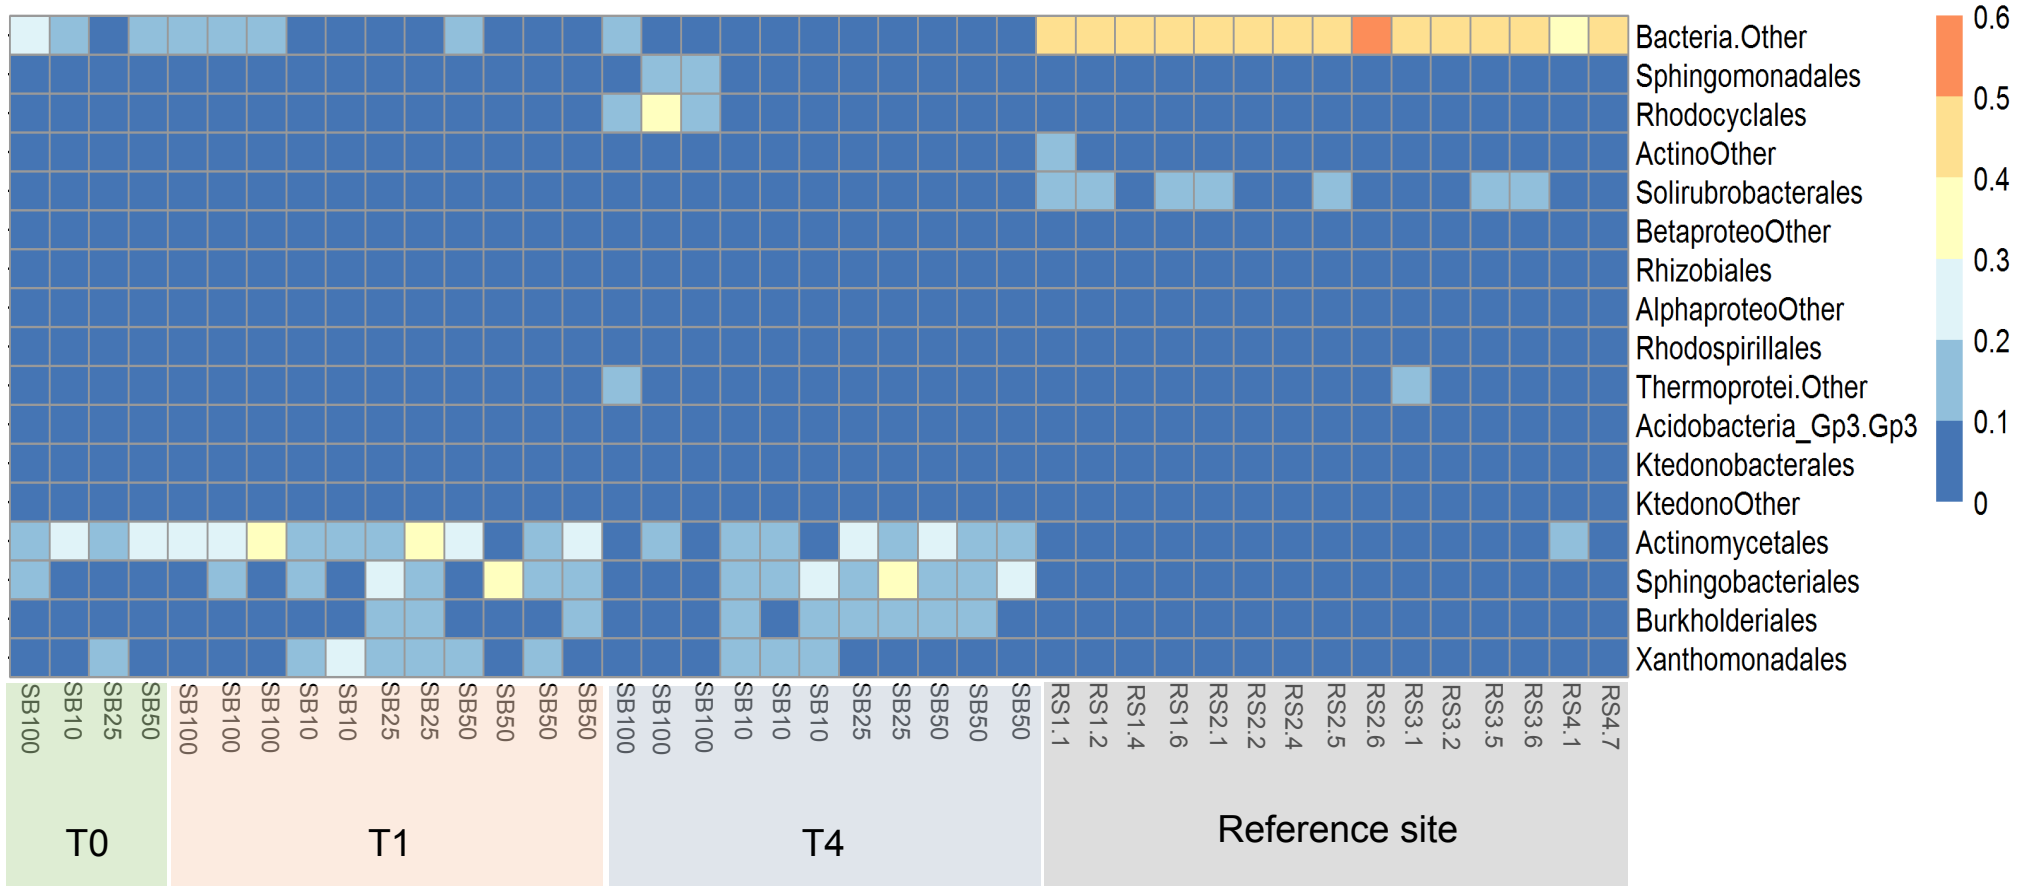

Fig S3

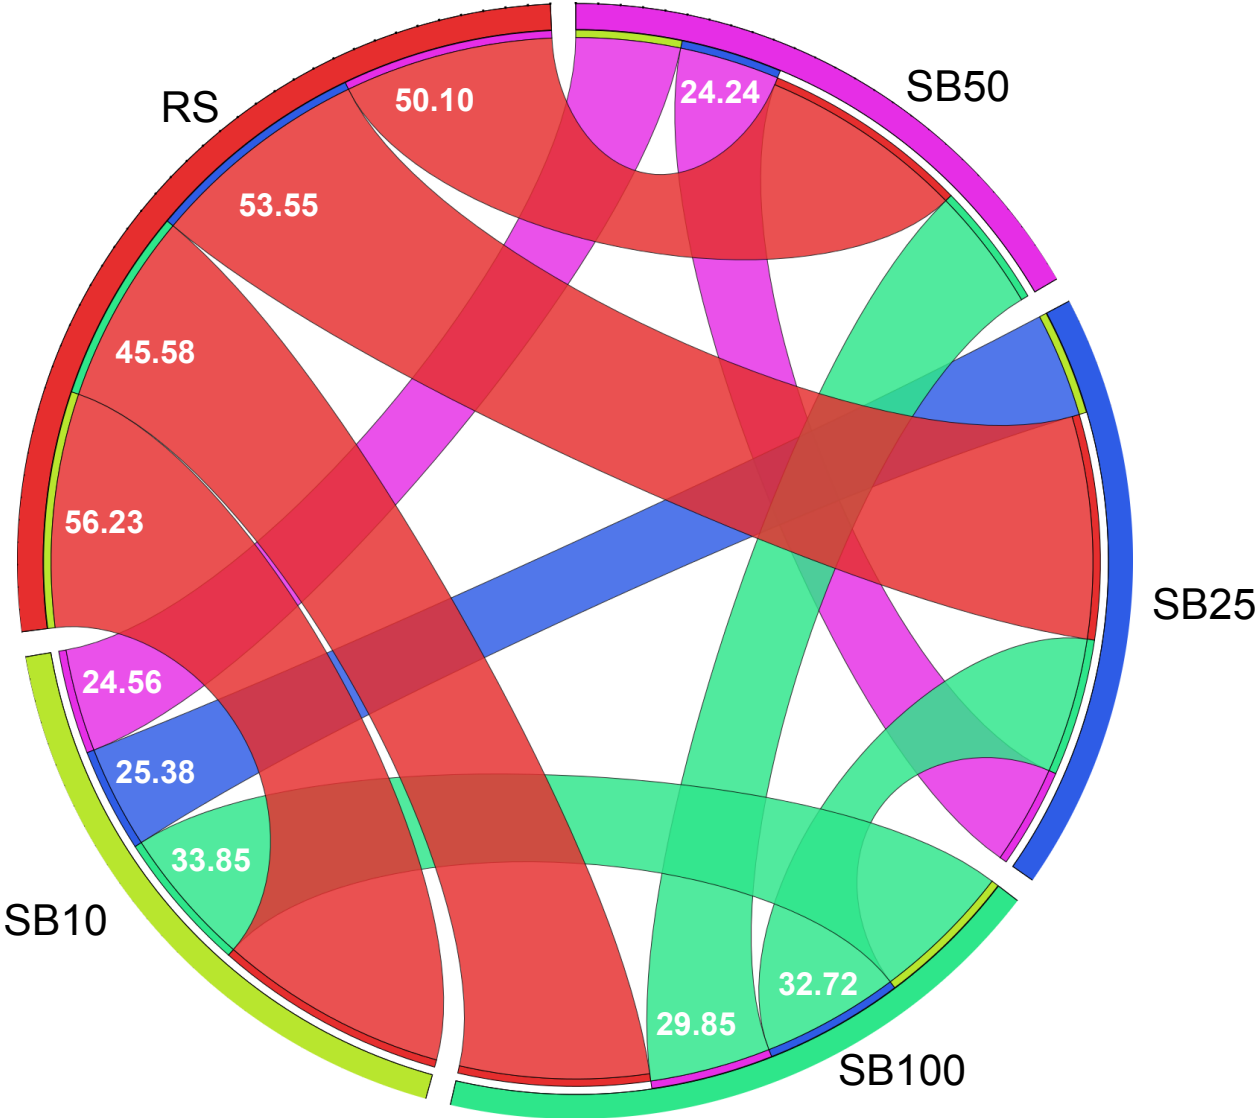

**Fig S4**

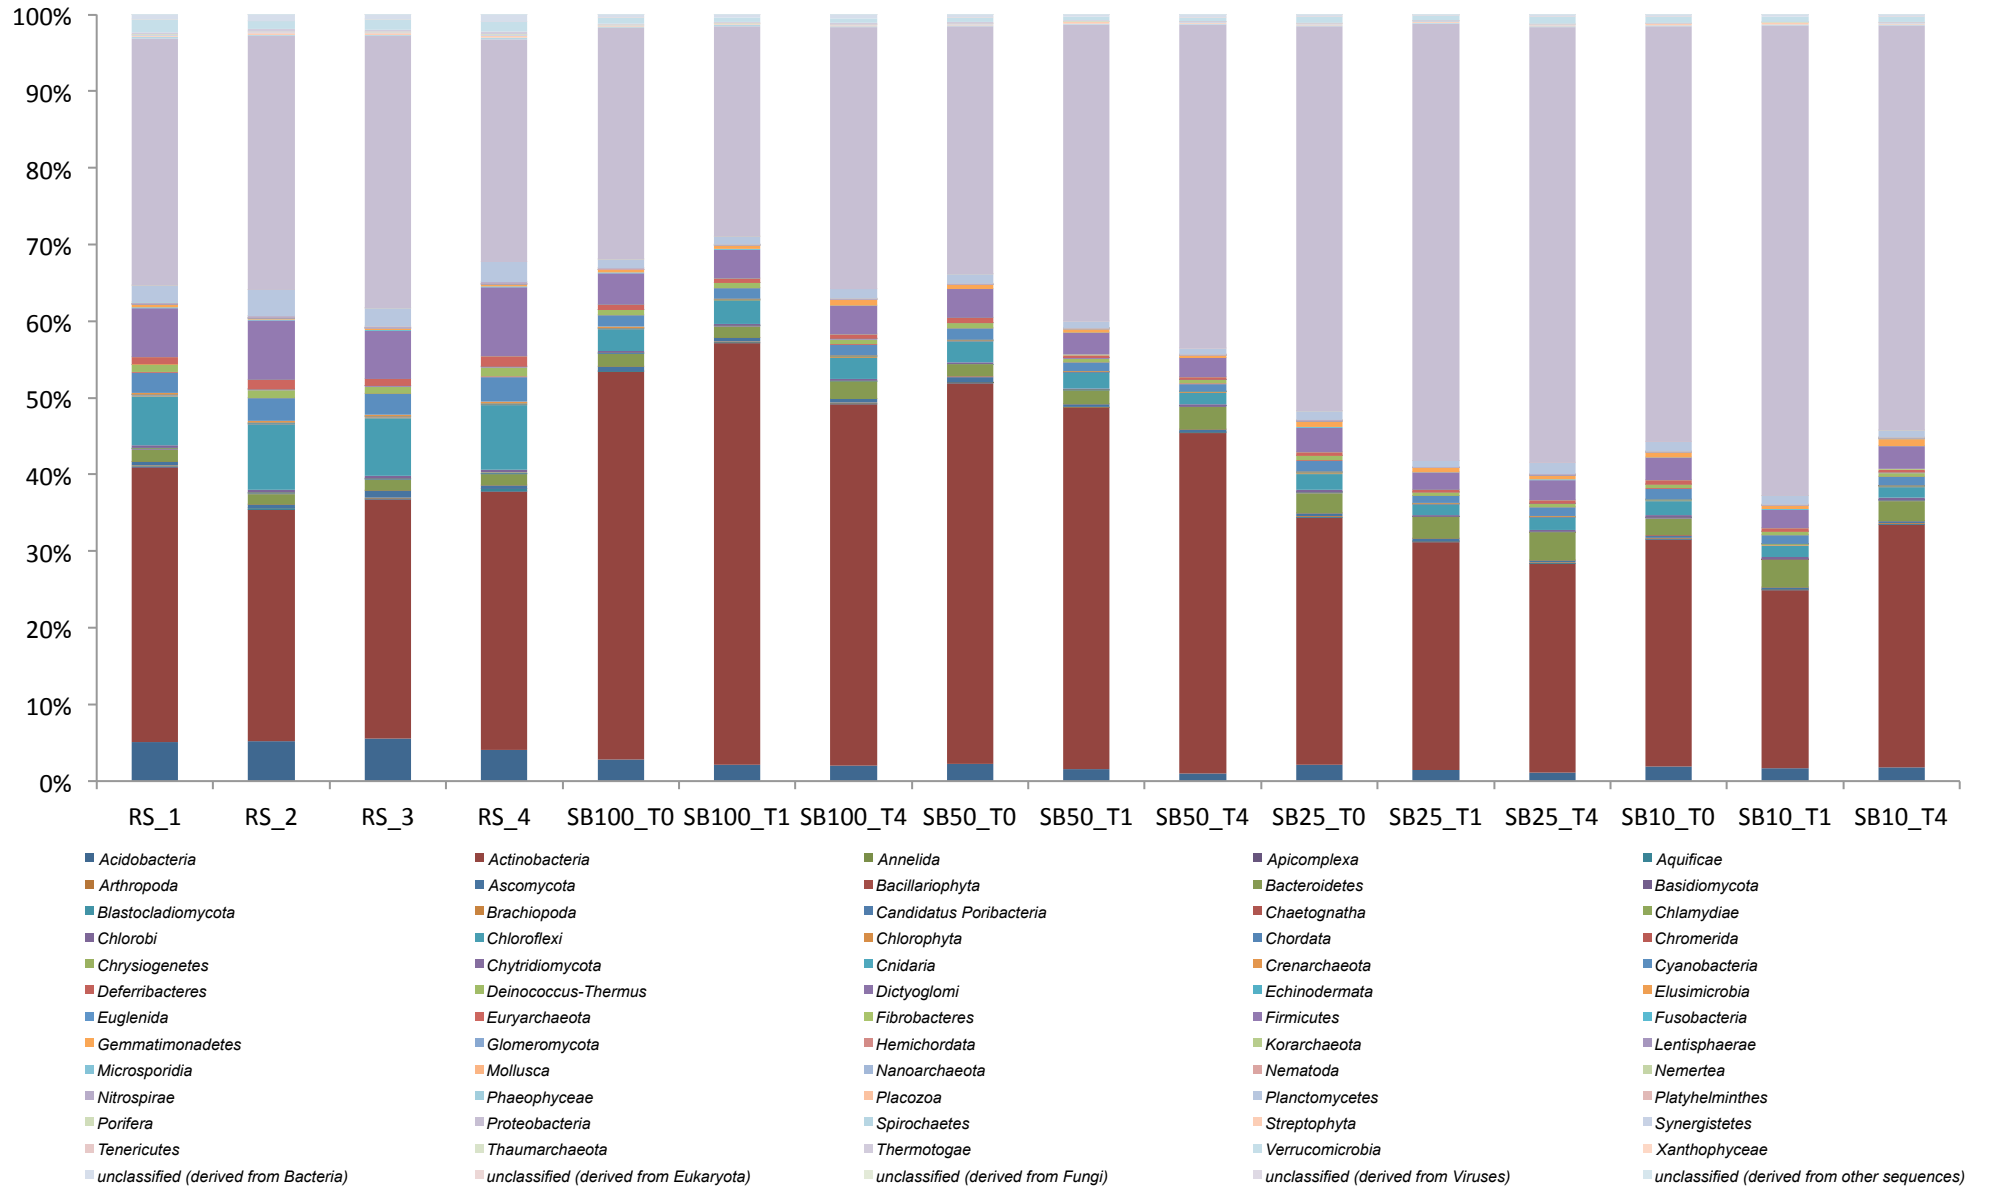

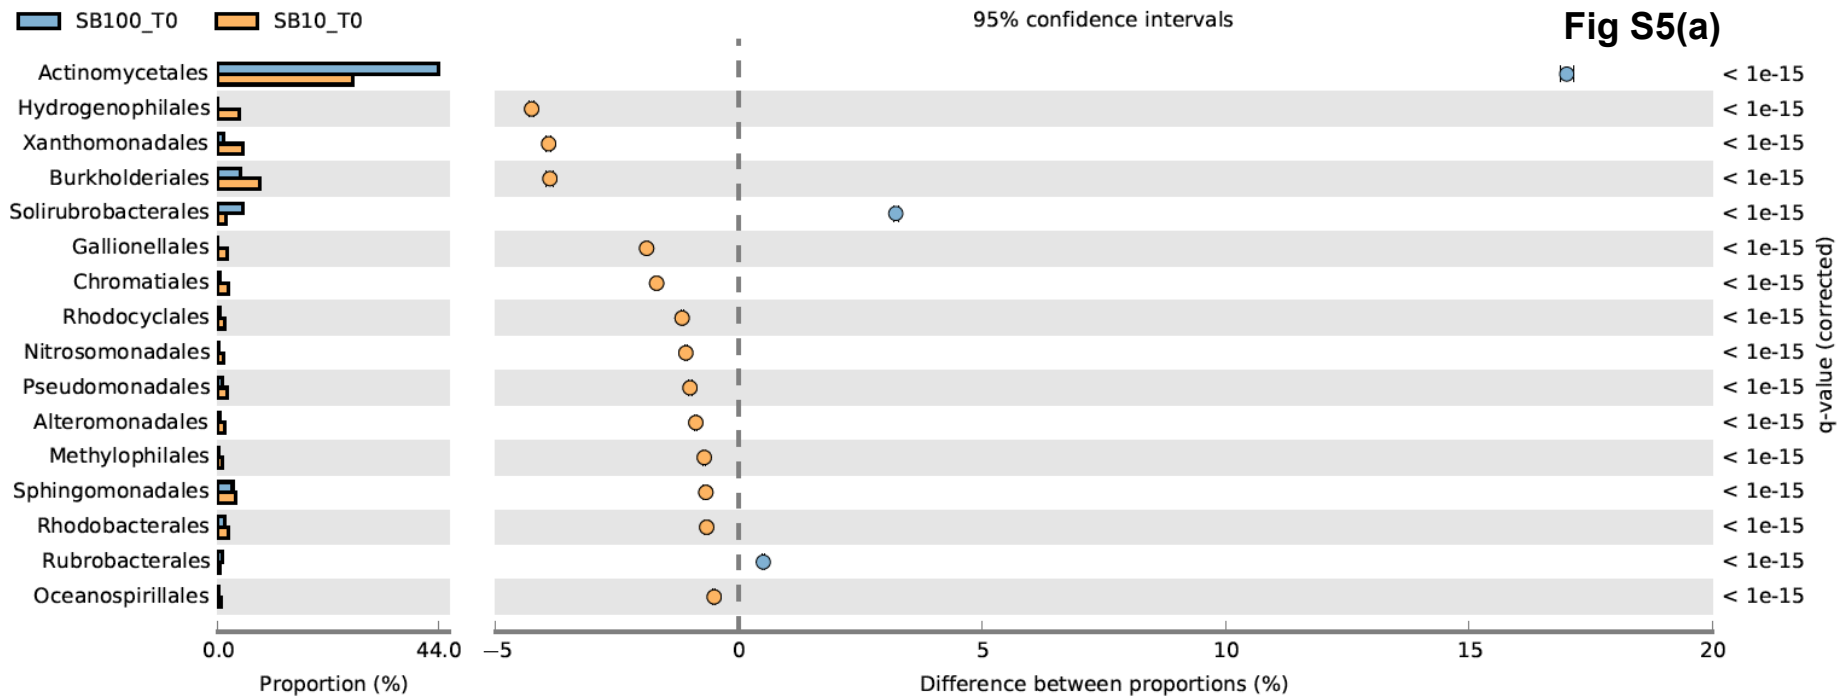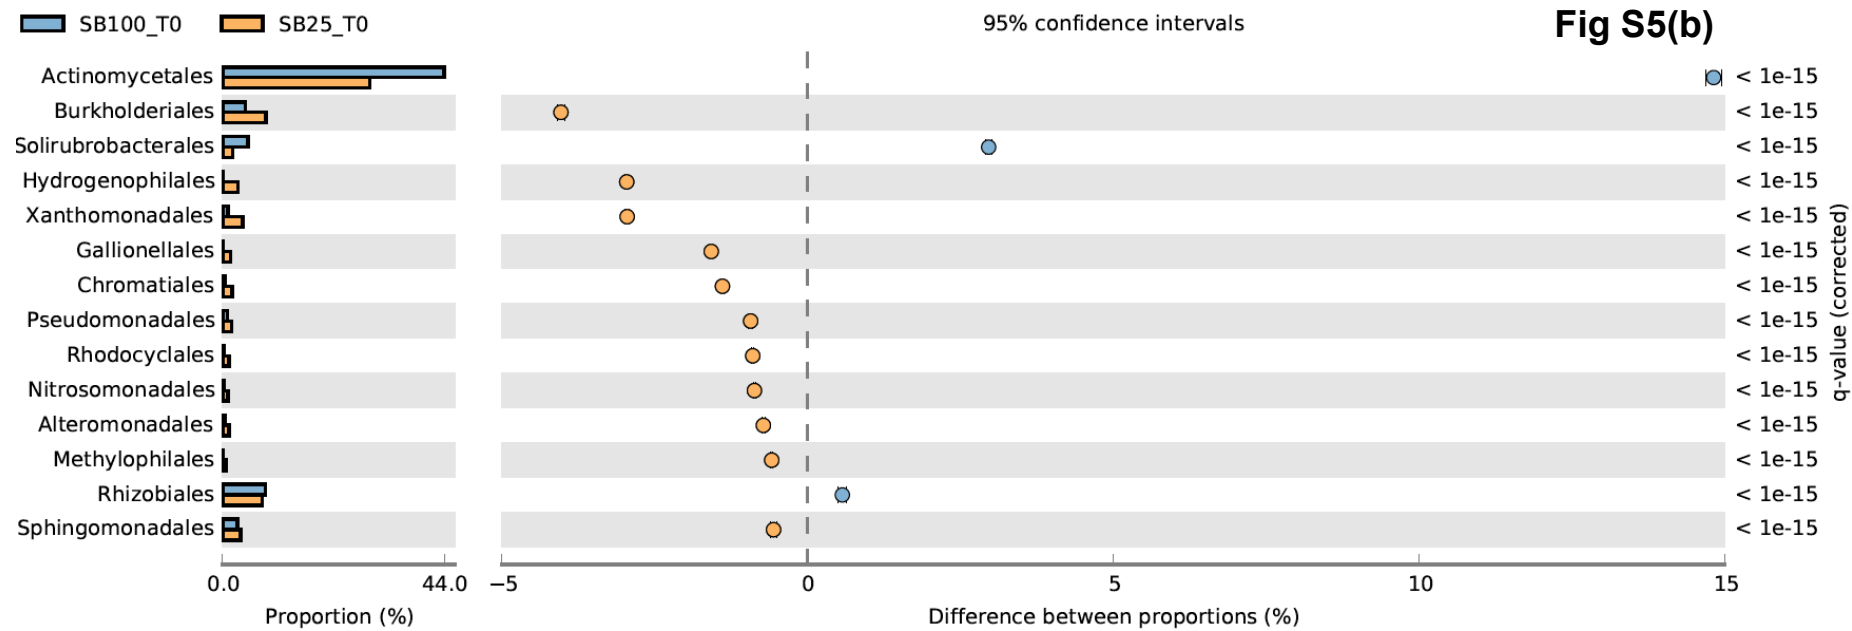



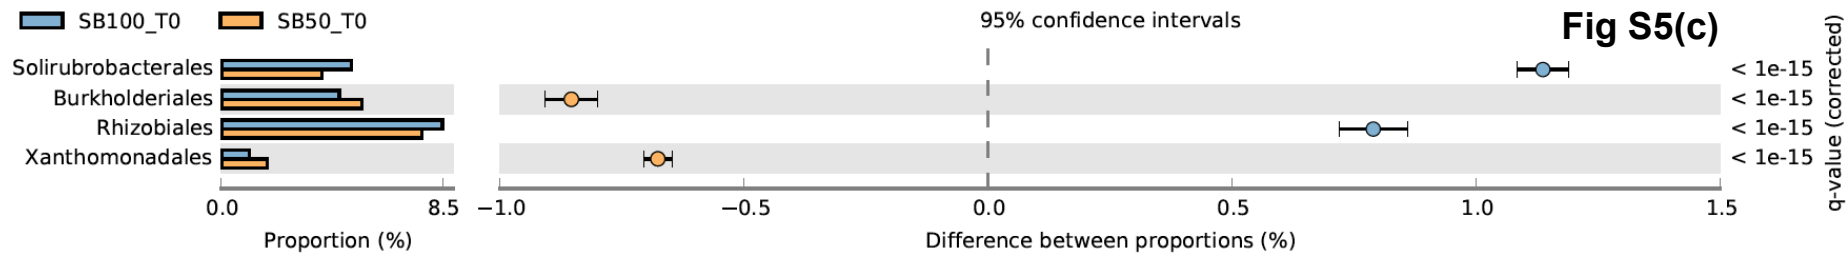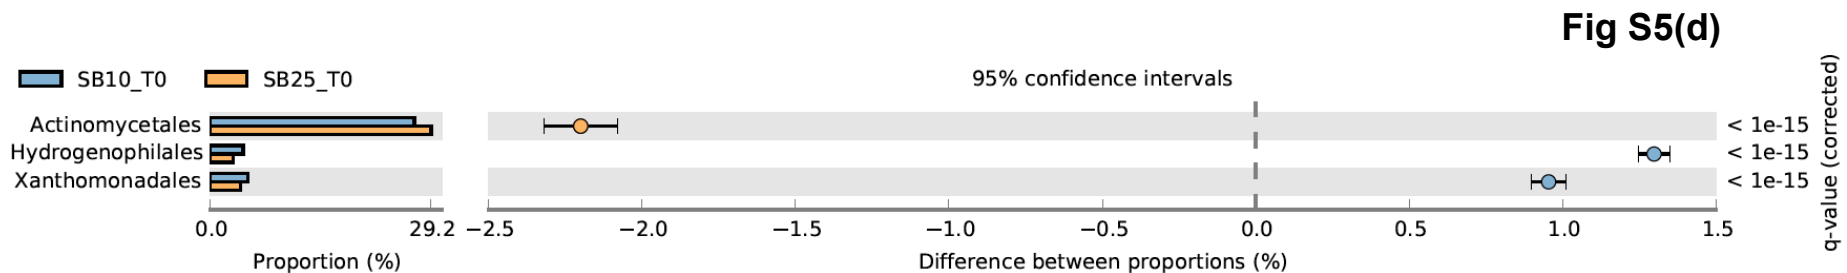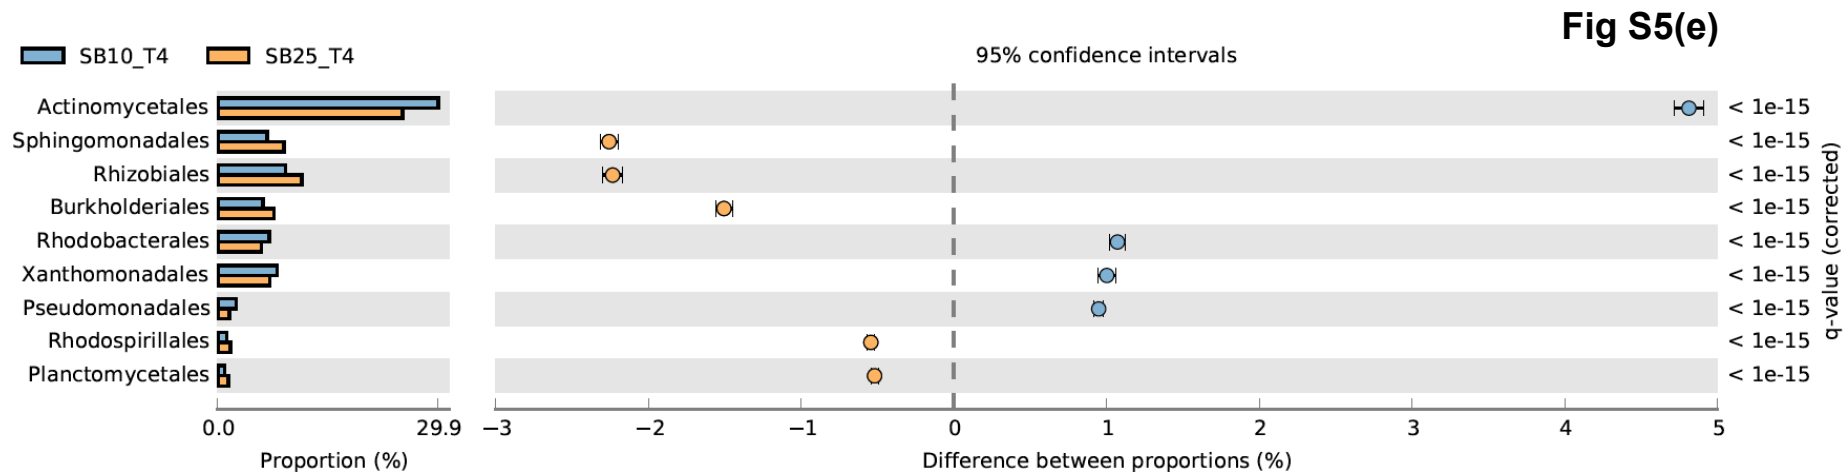

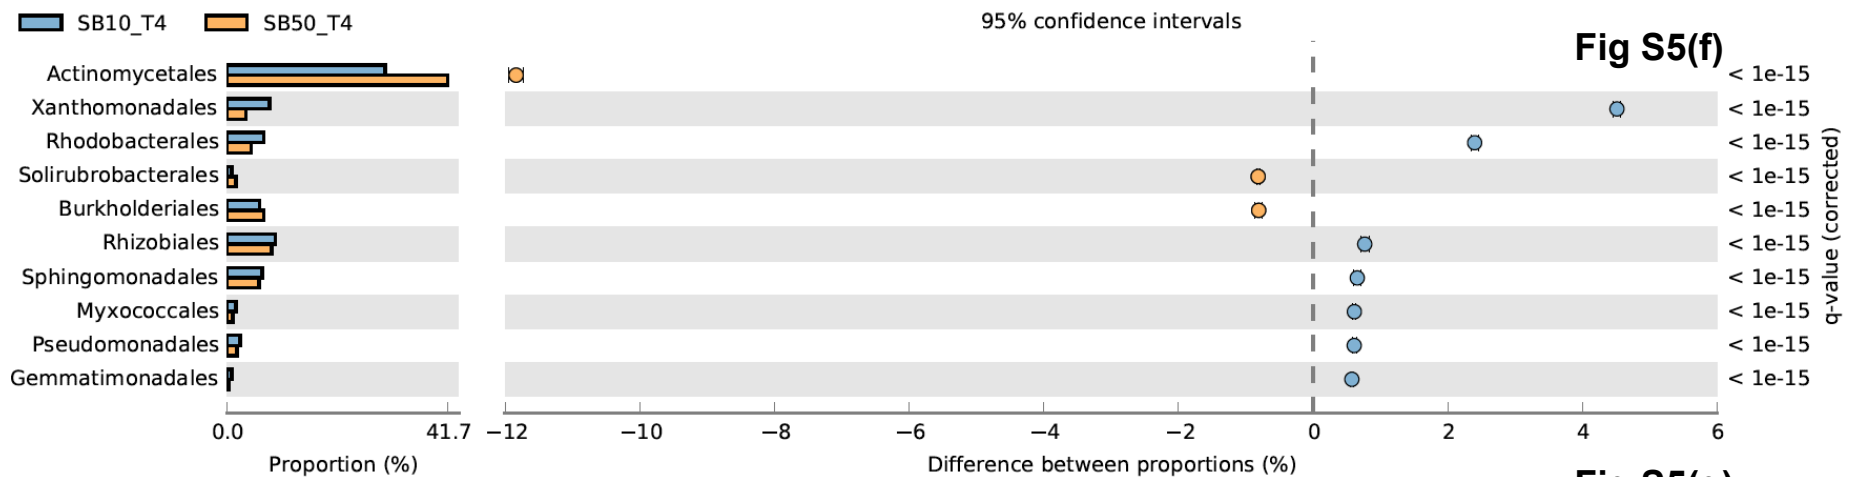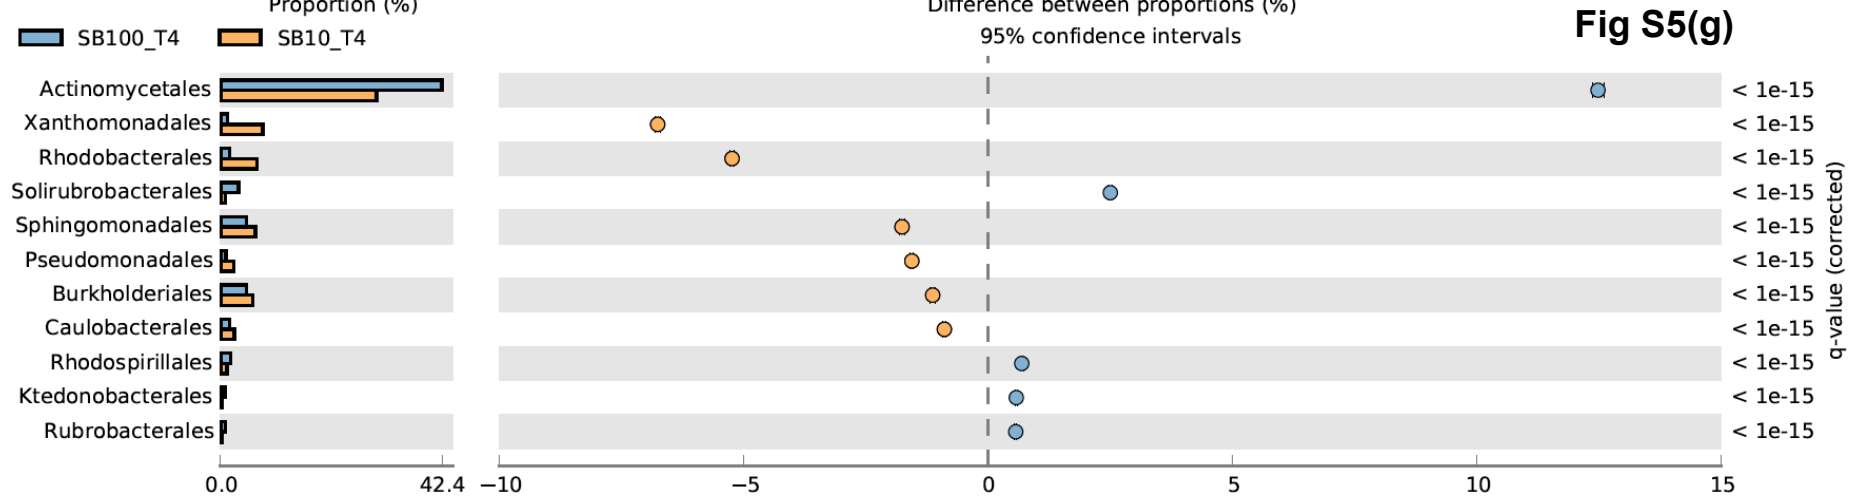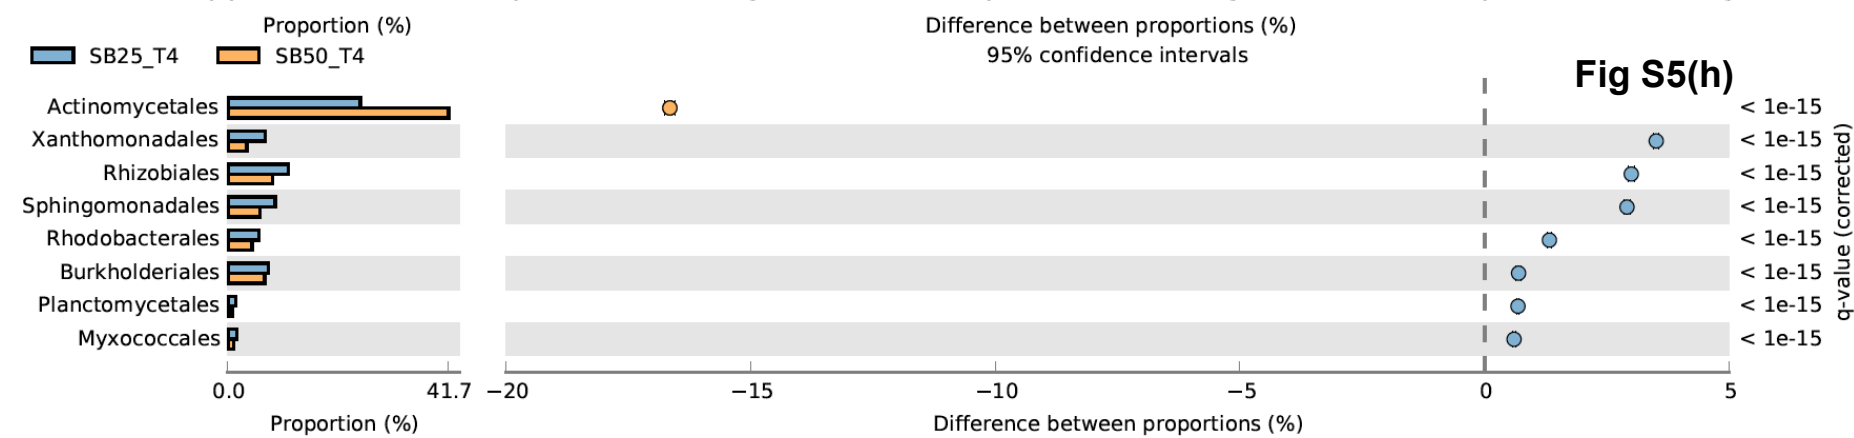



**Fig S5(i)**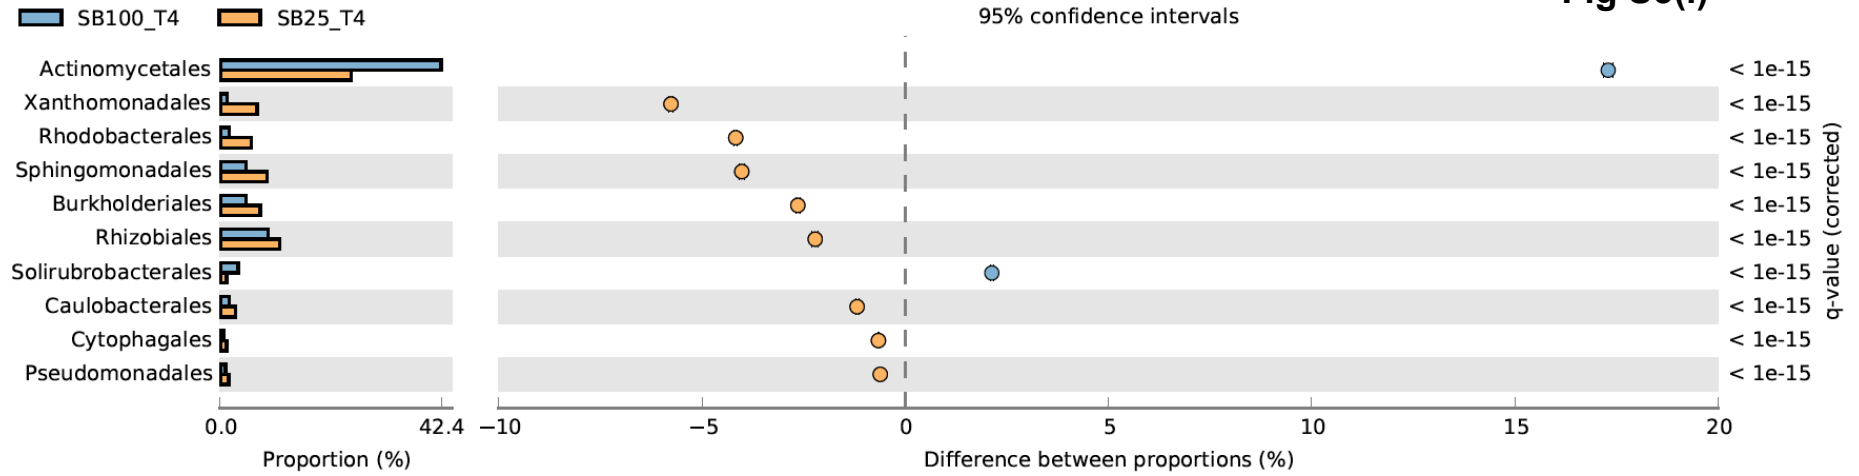**Fig S5(j)**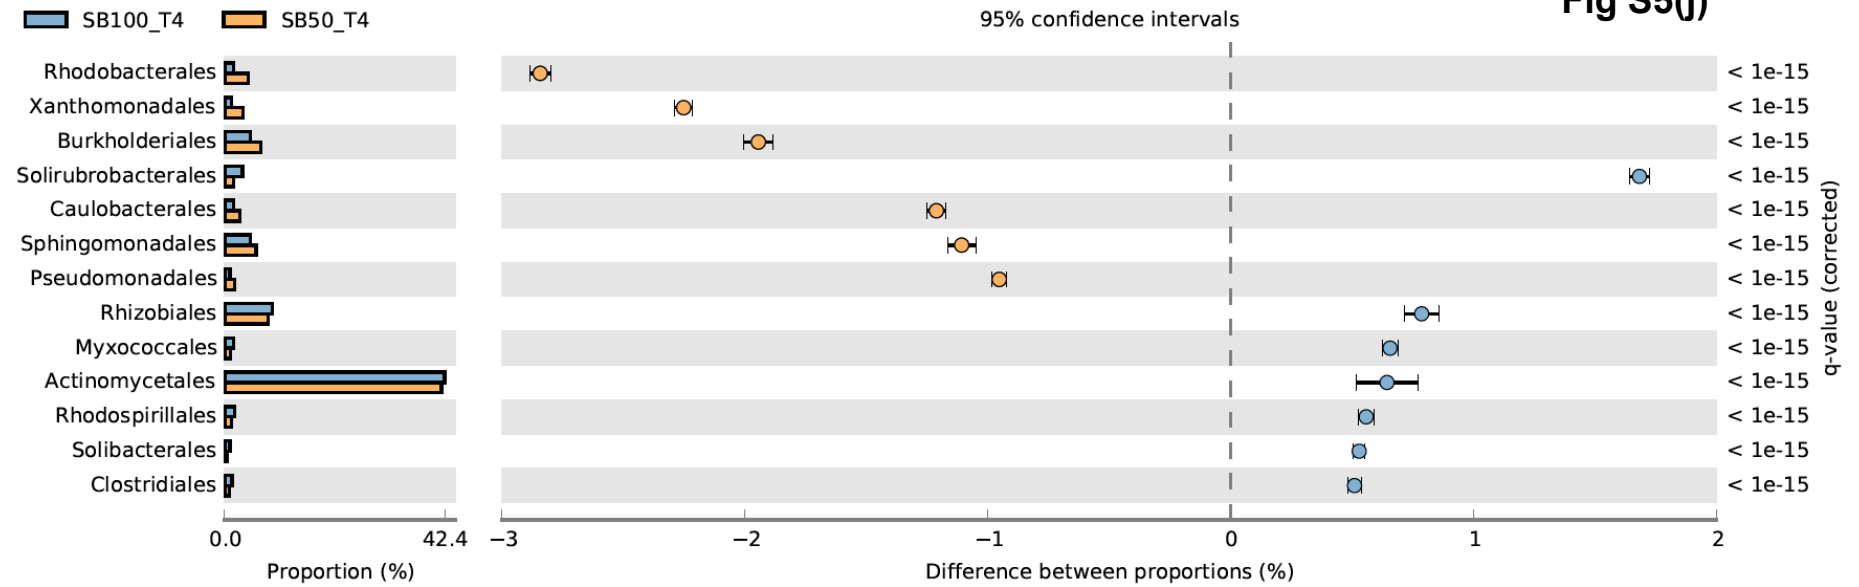

Fig S6

RS SB100 SB50  
SB10 SB25

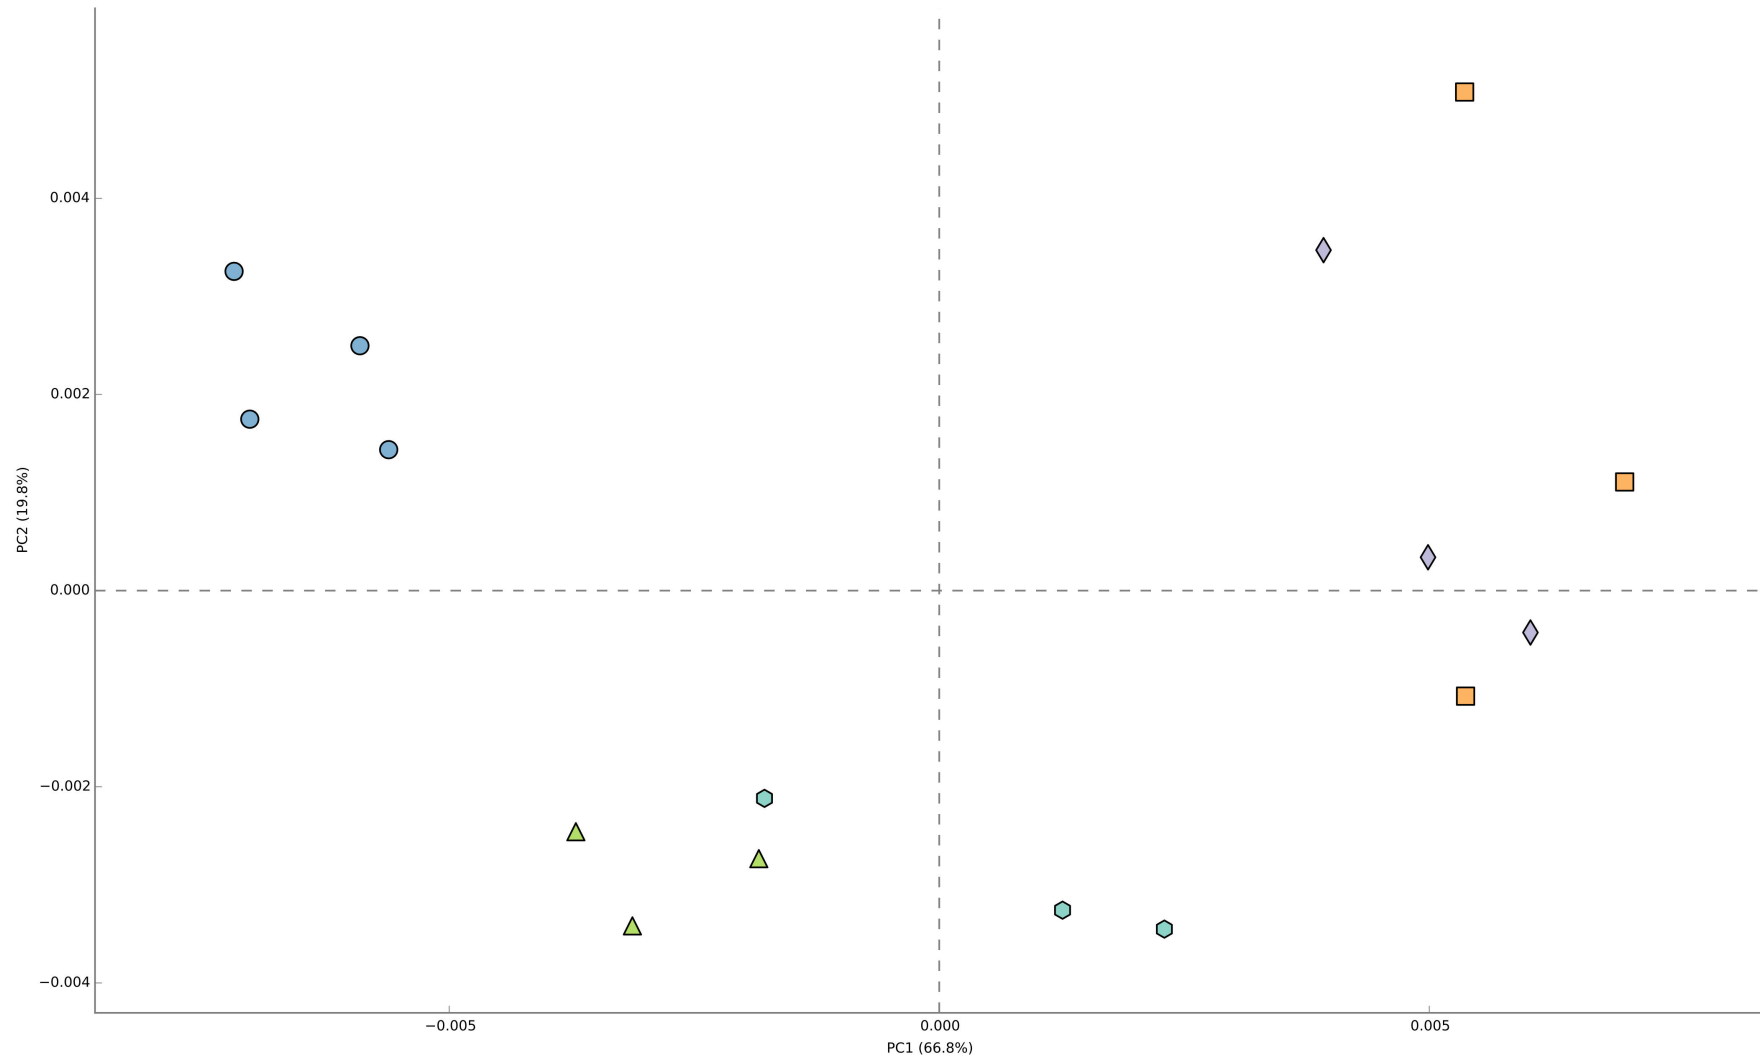

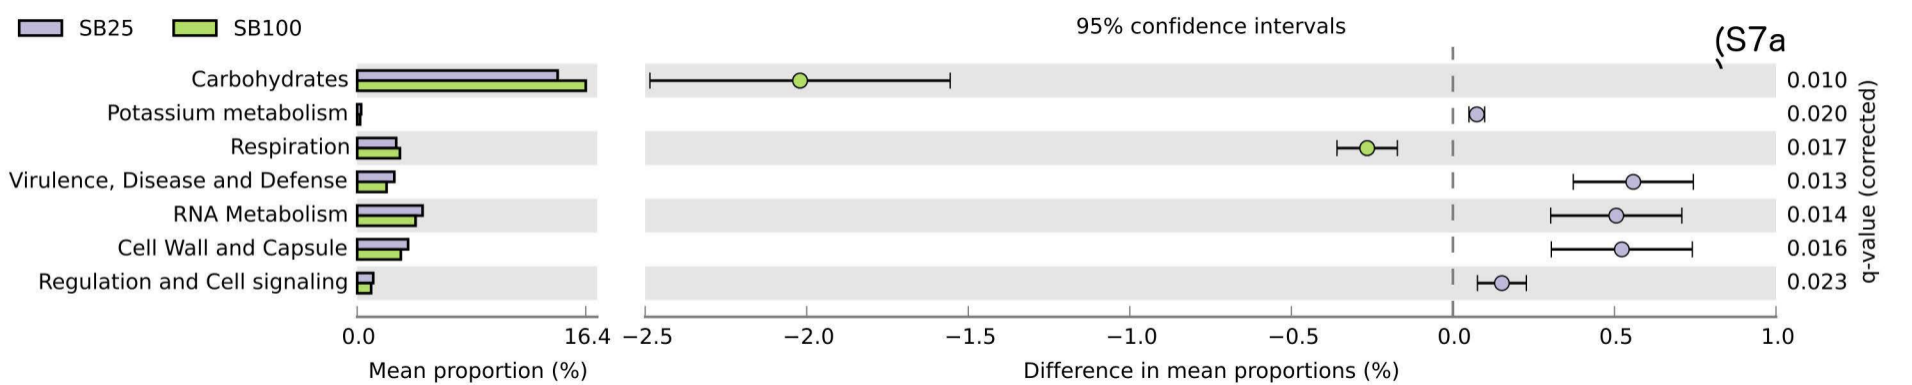

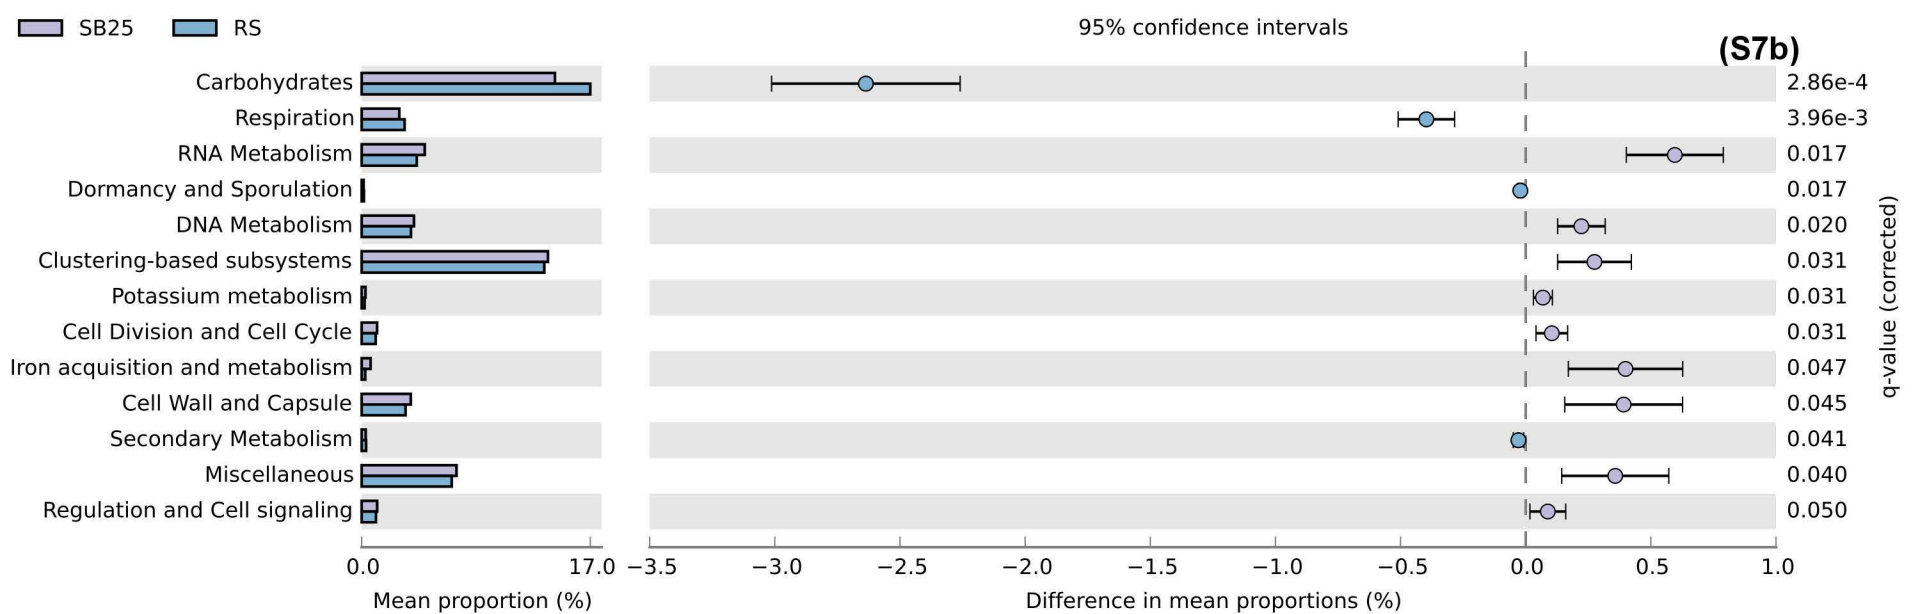

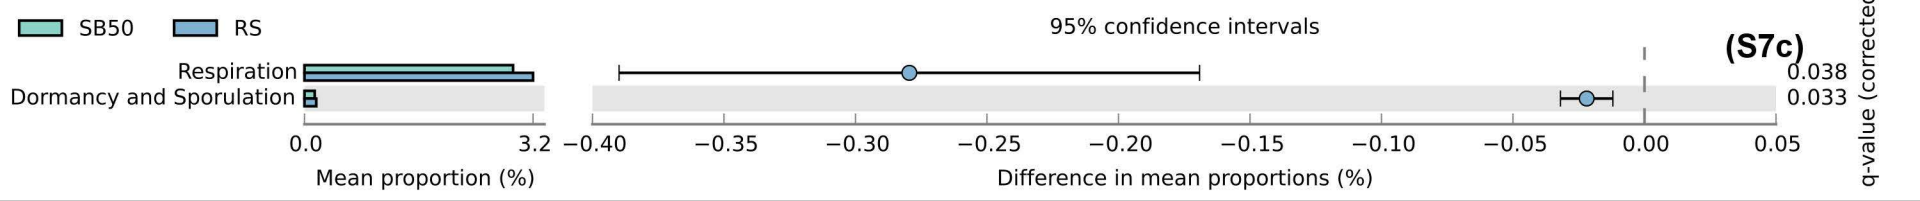

|          | NH4-N | NO3-N | P     | K     | S     | Org C | EC    | pH  | Cu    | Fe    | Mn    | Zn    | Al       | Ca       | Mg       | Exc. K   | Na       | B     |
|----------|-------|-------|-------|-------|-------|-------|-------|-----|-------|-------|-------|-------|----------|----------|----------|----------|----------|-------|
|          | mg/Kg | mg/Kg | mg/Kg | mg/Kg | mg/Kg | %     | dS/m  |     | mg/Kg | mg/Kg | mg/Kg | mg/Kg | meq/100g | meq/100g | meq/100g | meq/100g | meq/100g | mg/Kg |
| T0.SB100 | 11    | 19    | 4     | 629   | 119.8 | 0.65  | 0.56  | 5.7 | 1.17  | 13.79 | 20.72 | 0.77  | 0.287    | 2.34     | 0.92     | 1.1      | 1.41     | 1.05  |
| T0.SB10  | 1     | 4     | 3     | 2785  | 105.4 | 0.33  | 0.37  | 8   | 1.02  | 47.01 | 11.11 | 1.2   | 0.027    | 3.8      | 0.49     | 1.49     | 0.63     | 0.48  |
| T0.SB25  | 1     | 4     | 3     | 2668  | 112.7 | 0.41  | 0.4   | 8   | 1.23  | 44.13 | 12.26 | 1.4   | 0.032    | 4.01     | 0.52     | 1.43     | 0.71     | 0.5   |
| T0.SB50  | 2     | 10    | 3     | 2189  | 125.5 | 0.46  | 0.48  | 7.8 | 1.07  | 35.8  | 15.04 | 1.05  | 0.059    | 4.39     | 0.6      | 1.42     | 0.91     | 0.65  |
| T1.SB100 | 10    | 15    | 4     | 638   | 113.2 | 0.7   | 0.46  | 6.1 | 1.31  | 11.34 | 16.86 | 0.77  | 0.194    | 2.21     | 0.78     | 1.03     | 1.13     | 1.12  |
| T1.SB10  | 1     | 4     | 3     | 2831  | 78.2  | 0.34  | 0.29  | 8.1 | 0.83  | 51.62 | 11.6  | 1.05  | 0.037    | 3.96     | 0.44     | 1.44     | 0.49     | 0.52  |
| T1.SB25  | 1     | 6     | 3     | 2700  | 87.1  | 0.39  | 0.35  | 8   | 1.02  | 43.75 | 13.16 | 1.09  | 0.045    | 3.99     | 0.49     | 1.44     | 0.67     | 0.56  |
| T1.SB50  | 1     | 8     | 3     | 2074  | 101.6 | 0.59  | 0.4   | 7.9 | 1.06  | 36.61 | 13.86 | 0.95  | 0.071    | 4.54     | 0.56     | 1.4      | 0.79     | 0.69  |
| T4.SB100 | 5     | 5     | 3     | 545   | 40    | 0.46  | 0.15  | 5.9 | 1.11  | 14.76 | 7.55  | 0.52  | 0.186    | 1.86     | 0.56     | 0.87     | 0.5      | 1.46  |
| T4.SB10  | 0     | 1     | 3     | 2841  | 35.6  | 0.28  | 0.18  | 8.2 | 1.16  | 50.69 | 10.85 | 1.11  | 0.034    | 3.76     | 0.4      | 1.3      | 0.27     | 0.99  |
| T4.SB25  | 1     | 0     | 3     | 2578  | 26.8  | 0.33  | 0.18  | 8.2 | 1.04  | 47.99 | 11.63 | 1.02  | 0.051    | 4.04     | 0.41     | 1.31     | 0.3      | 0.87  |
| T4.SB50  | 1     | 4     | 3     | 2166  | 29.7  | 0.45  | 0.2   | 8   | 1.05  | 36.85 | 11.47 | 0.78  | 0.081    | 4.22     | 0.46     | 1.28     | 0.38     | 0.85  |
| RS1.1    | 3     | 0     | 0     | 90    | 12.3  | 0.61  | 0.016 | 4.3 | 1.48  | 22.39 | 4.31  | 0.72  | 0.897    | 0.42     | 0.13     | 0.21     | 0.03     | 0.48  |
| RS1.2    | 5     | 1     | 2     | 82    | 9.1   | 1.24  | 0.021 | 4.4 | 0.94  | 55.7  | 9.1   | 0.57  | 0.655    | 0.83     | 0.29     | 0.21     | 0.05     | 0.65  |
| RS1.4    | 24    | 16    | 3     | 93    | 17.8  | 0.51  | 0.039 | 4.4 | 0.73  | 8.41  | 2.49  | 0.45  | 0.622    | 0.34     | 0.11     | 0.22     | 0.08     | 0.39  |
| RS1.6    | 21    | 33    | 2     | 72    | 16.4  | 0.61  | 0.076 | 4.2 | 0.85  | 17.51 | 3.72  | 0.46  | 0.696    | 0.62     | 0.15     | 0.19     | 0.17     | 0.54  |
| RS2.1    | 35    | 5     | 3     | 137   | 20.5  | 0.98  | 0.8   | 4.3 | 1.08  | 24.51 | 10.39 | 0.91  | 0.545    | 1.04     | 0.79     | 0.31     | 3.16     | 0.69  |
| RS2.2    | 3     | 0     | 2     | 84    | 7     | 0.81  | 0.012 | 4.5 | 1.18  | 21.15 | 7.51  | 0.58  | 0.458    | 1.44     | 0.41     | 0.21     | 0.07     | 0.54  |
| RS2.4    | 4     | 1     | 2     | 141   | 8.6   | 1.04  | 0.031 | 4.4 | 1.21  | 16.81 | 15.96 | 0.98  | 0.629    | 0.49     | 0.22     | 0.32     | 0.06     | 0.57  |
| RS2.5    | 3     | 0     | 0     | 83    | 14.7  | 0.55  | 0.014 | 4.2 | 0.81  | 13.98 | 1.93  | 0.48  | 1.036    | 0.13     | 0.08     | 0.19     | 0.02     | 0.52  |
| RS2.6    | 2     | 2     | 2     | 110   | 7.3   | 0.33  | 0.014 | 4.6 | 0.64  | 9.25  | 6.03  | 0.31  | 0.407    | 0.75     | 0.24     | 0.28     | 0.06     | 0.66  |
| RS3.1    | 6     | 2     | 3     | 101   | 11.3  | 1.3   | 0.02  | 4.3 | 0.83  | 46.92 | 4.14  | 0.6   | 0.787    | 0.71     | 0.26     | 0.26     | 0.05     | 0.66  |
| RS3.2    | 10    | 8     | 3     | 156   | 13.1  | 1.33  | 0.04  | 4.4 | 1.22  | 29.93 | 16.65 | 0.72  | 0.617    | 0.89     | 0.29     | 0.38     | 0.09     | 0.79  |
| RS3.5    | 3     | 2     | 3     | 67    | 14.3  | 0.72  | 0.021 | 4.1 | 0.91  | 22.76 | 1.21  | 0.41  | 1.028    | 0.29     | 0.1      | 0.17     | 0.03     | 0.97  |
| RS3.6    | 2     | 2     | 2     | 58    | 17.8  | 0.39  | 0.018 | 4.1 | 0.92  | 12.74 | 1.25  | 0.39  | 1.119    | 0.2      | 0.08     | 0.15     | 0.03     | 0.54  |
| RS4.1    | 39    | 31    | 5     | 257   | 27.5  | 0.92  | 0.237 | 4.4 | 1.49  | 26.62 | 6.29  | 1.25  | 0.403    | 1.41     | 0.56     | 0.62     | 0.31     | 1.06  |
| RS4.7    | 3     | 1     | 3     | 150   | 10.4  | 1.01  | 0.034 | 4.5 | 1.4   | 9.3   | 20.22 | 0.68  | 0.57     | 0.58     | 0.3      | 0.35     | 0.13     | 0.69  |

**Chemical Characteristics of topsoil and tailings used for substrate blend preparation**

| Units            | EC   | pH  | OrgC | N      | P     | Al    | B     | Ca    | Cu    | Fe    | K     | Mg    | Mn    | Na    | P     | S     | Zn    |
|------------------|------|-----|------|--------|-------|-------|-------|-------|-------|-------|-------|-------|-------|-------|-------|-------|-------|
|                  | mS/m |     | %    | %      | mg/kg | mg/kg | mg/kg | mg/kg | mg/kg | mg/kg | mg/kg | mg/kg | mg/kg | mg/kg | mg/kg | mg/kg | mg/kg |
| Topsoil (stored) | 18   | 6.7 | 0.69 | 0.028  | 240   | >550  | 1     | 470   | 2.2   | 58    | 370   | 83    | 52    | 120   | 16    | 61    | 1     |
| Tailings         | 16   | 9.7 | 0.2  | <0.005 | 1100  | 59    | 0.4   | 4000  | 1.5   | 550   | 550   | 150   | 48    | 46    | 6     | 21    | 3.5   |

| Factor                  | Treatment |          |        |         |
|-------------------------|-----------|----------|--------|---------|
|                         | SB10      | SB25     | SB50   | SB100   |
| Ammonium Nitrogen       | 0.83b     | 1.00b    | 1.33b  | 7.50a   |
| Nitrate Nitrogen        | 3b        | 5ab      | 7.33ab | 10a     |
| Phosphorus (Colwell)    | 3a        | 3a       | 3a     | 3.33a   |
| Potassium (Colwell)     | 2819a     | 2648.67b | 2143c  | 591.33d |
| Sulphur                 | 73.07a    | 75.53a   | 85.6a  | 71.4a   |
| Organic Carbon          | 0.31c     | 0.37bc   | 0.5ab  | 0.61a   |
| Conductivity            | 0.28a     | 0.31a    | 0.36a  | 0.39a   |
| pH (CaCl <sub>2</sub> ) | 8.1a      | 8.06a    | 7.9a   | 6.23b   |
| Copper                  | 1a        | 1.09a    | 1.06a  | 1.54a   |
| Iron                    | 49.77a    | 45.29a   | 36.42a | 28.03a  |
| Manganese               | 11.18a    | 12.35a   | 13.45a | 25.47a  |
| Zinc                    | 1.12a     | 1.17a    | 0.92ab | 0.76b   |
| Exc. Aluminium          | 0.03b     | 0.04b    | 0.07b  | 0.31a   |
| Exc. Calcium            | 3.84b     | 4.01b    | 4.38a  | 2.03c   |
| Exc. Magnesium          | 0.44b     | 0.47b    | 0.54b  | 0.72a   |
| Exc. Potassium          | 1.41a     | 1.39a    | 1.36a  | 0.95b   |
| Exc. Sodium             | 0.46a     | 0.56a    | 0.69a  | 0.81a   |
| Boron                   | 0.66b     | 0.64b    | 0.73b  | 1.19a   |



**Table S3** Similarity percentage (SIMPER) analysis of major taxa (at the level of Order) contributing to dissimilarity between different substrate blends.

|                                                                 |           |          |         |         |          |       |
|-----------------------------------------------------------------|-----------|----------|---------|---------|----------|-------|
| Groups SB100 & SB10                                             |           |          |         |         |          |       |
| Average dissimilarity = 33.85                                   |           |          |         |         |          |       |
|                                                                 |           |          |         |         |          |       |
|                                                                 | Group 100 | Group 10 |         |         |          |       |
| Taxa                                                            | Av.Abund  | Av.Abund | Av.Diss | Diss/SD | Contrib% | Cum.% |
| Xanthomonadales                                                 | 0.15      | 0.38     | 2.34    | 2       | 6.92     | 6.92  |
| Rhodocyclales                                                   | 0.2       | 0.06     | 2.02    | 1.03    | 5.98     | 12.9  |
| Sphingobacteriales                                              | 0.27      | 0.39     | 1.39    | 1.46    | 4.09     | 16.99 |
| Actinomycetales                                                 | 0.4       | 0.39     | 1.25    | 1.45    | 3.69     | 20.69 |
| Rhodobacterales                                                 | 0.03      | 0.15     | 1.22    | 1.64    | 3.62     | 24.31 |
| Bacteria;Other                                                  | 0.36      | 0.24     | 1.21    | 1.6     | 3.58     | 27.88 |
| Thermoprotei;Other                                              | 0.14      | 0.05     | 1.15    | 1.09    | 3.4      | 31.28 |
| Burkholderiales                                                 | 0.22      | 0.31     | 0.98    | 1.52    | 2.89     | 34.18 |
| Ohtaekwangia                                                    | 0.03      | 0.13     | 0.95    | 1.24    | 2.81     | 36.99 |
| Sphingomonadales                                                | 0.24      | 0.21     | 0.88    | 1.17    | 2.6      | 39.59 |
| BetaproteoOther                                                 | 0.15      | 0.11     | 0.79    | 1.23    | 2.35     | 41.94 |
| Acidobacteria_Gp3;Gp3                                           | 0.13      | 0.08     | 0.78    | 1.34    | 2.29     | 44.23 |
| Solirubrobacterales                                             | 0.18      | 0.13     | 0.73    | 1.66    | 2.17     | 46.4  |
| Caulobacterales                                                 | 0.08      | 0.14     | 0.69    | 1.91    | 2.04     | 48.44 |
| Rhodospirillales                                                | 0.15      | 0.11     | 0.64    | 1.34    | 1.89     | 50.33 |
| Hydrogenophilales                                               | 0.06      | 0.06     | 0.62    | 1.22    | 1.83     | 52.15 |
| Bacillales                                                      | 0.11      | 0.09     | 0.58    | 1.54    | 1.73     | 53.88 |
| Acidobacteria_Gp6;Gp6                                           | 0.03      | 0.09     | 0.58    | 1.63    | 1.72     | 55.6  |
| GammaproteoOther                                                | 0.07      | 0.09     | 0.55    | 1.96    | 1.63     | 57.23 |
| KtedonoOther                                                    | 0.08      | 0.06     | 0.54    | 1.35    | 1.6      | 58.83 |
| Acidobacteria_Gp3;Other                                         | 0.07      | 0.03     | 0.53    | 1.45    | 1.55     | 60.38 |
| ActinoOther                                                     | 0.15      | 0.12     | 0.49    | 1.92    | 1.45     | 61.83 |
| Verrucomicrobia;Subdivision3;Subdivision3_genera_incertae_sedis | 0.06      | 0.09     | 0.47    | 1.43    | 1.39     | 63.22 |
| Pseudomonadales                                                 | 0.06      | 0.09     | 0.45    | 1.42    | 1.34     | 64.56 |
| Acidobacteria_Gp1;Gp1                                           | 0.06      | 0.02     | 0.45    | 1.84    | 1.33     | 65.89 |
| Acidobacteria_Gp4;Gp4                                           | 0.05      | 0.02     | 0.45    | 1.14    | 1.32     | 67.21 |
| Acidobacteria_Gp2;Gp2                                           | 0.04      | 0        | 0.43    | 0.4     | 1.26     | 68.47 |
| Ktedonobacterales                                               | 0.04      | 0.02     | 0.4     | 1.22    | 1.19     | 69.67 |

|                               |           |          |         |         |          |       |
|-------------------------------|-----------|----------|---------|---------|----------|-------|
| Flavobacteriales              | 0.05      | 0.02     | 0.4     | 1.19    | 1.19     | 70.86 |
|                               |           |          |         |         |          |       |
| Groups SB100 & SB25           |           |          |         |         |          |       |
| Average dissimilarity = 32.72 |           |          |         |         |          |       |
|                               |           |          |         |         |          |       |
|                               | Group 100 | Group 25 |         |         |          |       |
| Taxa                          | Av.Abund  | Av.Abund | Av.Diss | Diss/SD | Contrib% | Cum.% |
| Rhodocyclales                 | 0.2       | 0.08     | 2.08    | 1.05    | 6.36     | 6.36  |
| Xanthomonadales               | 0.15      | 0.32     | 1.7     | 1.98    | 5.18     | 11.55 |
| Sphingobacteriales            | 0.27      | 0.36     | 1.33    | 1.2     | 4.08     | 15.62 |
| Actinomycetales               | 0.4       | 0.44     | 1.25    | 1.36    | 3.82     | 19.44 |
| Thermoprotei;Other            | 0.14      | 0.05     | 1.11    | 1.09    | 3.4      | 22.84 |
| Hydrogenophilales             | 0.06      | 0.1      | 1.1     | 0.93    | 3.36     | 26.21 |
| Bacteria;Other                | 0.36      | 0.27     | 1.01    | 1.43    | 3.08     | 29.28 |
| Burkholderiales               | 0.22      | 0.31     | 0.97    | 1.4     | 2.97     | 32.26 |
| BetaproteoOther               | 0.15      | 0.09     | 0.93    | 1.17    | 2.85     | 35.11 |
| Sphingomonadales              | 0.24      | 0.22     | 0.91    | 1.2     | 2.77     | 37.88 |
| Pseudomonadales               | 0.06      | 0.12     | 0.79    | 1.31    | 2.42     | 40.3  |
| Acidobacteria_Gp3;Gp3         | 0.13      | 0.09     | 0.76    | 1.67    | 2.33     | 42.62 |
| GammaproteoOther              | 0.07      | 0.1      | 0.74    | 1.05    | 2.25     | 44.87 |
| Solirubrobacteriales          | 0.18      | 0.14     | 0.71    | 1.47    | 2.16     | 47.04 |
| Rhodospirillales              | 0.15      | 0.14     | 0.62    | 1.52    | 1.9      | 48.94 |
| Ohtaekwangia                  | 0.03      | 0.07     | 0.59    | 1.21    | 1.81     | 50.75 |
| Rhodobacteriales              | 0.03      | 0.08     | 0.58    | 1.58    | 1.77     | 52.52 |
| Acidobacteria_Gp3;Other       | 0.07      | 0.02     | 0.57    | 1.49    | 1.74     | 54.25 |
| KtedonoOther                  | 0.08      | 0.06     | 0.56    | 1.71    | 1.71     | 55.96 |
| Bacillales                    | 0.11      | 0.11     | 0.5     | 1.34    | 1.53     | 57.49 |
| Gemmatimonadales              | 0.09      | 0.08     | 0.47    | 1.38    | 1.45     | 58.93 |
| ActinoOther                   | 0.15      | 0.14     | 0.44    | 1.58    | 1.35     | 60.28 |
| Acidobacteria_Gp2;Gp2         | 0.04      | 0        | 0.43    | 0.4     | 1.32     | 61.6  |
| Acidobacteria_Gp4;Gp4         | 0.05      | 0.02     | 0.43    | 1.43    | 1.31     | 62.91 |
| Acidobacteria_Gp6;Gp6         | 0.03      | 0.07     | 0.42    | 1.4     | 1.28     | 64.19 |
| Flavobacteriales              | 0.05      | 0.03     | 0.41    | 1.21    | 1.26     | 65.46 |
| Ktedonobacteriales            | 0.04      | 0.02     | 0.4     | 1.26    | 1.23     | 66.69 |
| Bdellovibrionales             | 0.04      | 0.05     | 0.39    | 1.39    | 1.2      | 67.89 |
| Acidobacteria_Gp1;Gp1         | 0.06      | 0.04     | 0.38    | 1.64    | 1.17     | 69.06 |

|                                                                 |          |          |         |         |          |       |
|-----------------------------------------------------------------|----------|----------|---------|---------|----------|-------|
| Alteromonadales                                                 | 0.02     | 0.04     | 0.38    | 1.23    | 1.17     | 70.23 |
|                                                                 |          |          |         |         |          |       |
| Groups SB10 & SB25                                              |          |          |         |         |          |       |
| Average dissimilarity = 25.38                                   |          |          |         |         |          |       |
|                                                                 |          |          |         |         |          |       |
|                                                                 | Group 10 | Group 25 |         |         |          |       |
| Taxa                                                            | Av.Abund | Av.Abund | Av.Diss | Diss/SD | Contrib% | Cum.% |
| Sphingobacteriales                                              | 0.39     | 0.36     | 1.28    | 1.51    | 5.05     | 5.05  |
| Actinomycetales                                                 | 0.39     | 0.44     | 1.08    | 1.34    | 4.25     | 9.3   |
| Hydrogenophilales                                               | 0.06     | 0.1      | 1.06    | 0.85    | 4.16     | 13.47 |
| Xanthomonadales                                                 | 0.38     | 0.32     | 1.03    | 1.2     | 4.05     | 17.52 |
| Ohtaekwangia                                                    | 0.13     | 0.07     | 0.92    | 1.29    | 3.63     | 21.15 |
| Rhodobacterales                                                 | 0.15     | 0.08     | 0.83    | 1.27    | 3.27     | 24.42 |
| Solirubrobacterales                                             | 0.13     | 0.14     | 0.81    | 1.4     | 3.18     | 27.6  |
| Rhodocyclales                                                   | 0.06     | 0.08     | 0.8     | 1.03    | 3.13     | 30.73 |
| Pseudomonadales                                                 | 0.09     | 0.12     | 0.69    | 1.42    | 2.71     | 33.44 |
| Burkholderiales                                                 | 0.31     | 0.31     | 0.67    | 1.47    | 2.64     | 36.07 |
| GammaproteoOther                                                | 0.09     | 0.1      | 0.65    | 1.14    | 2.56     | 38.64 |
| Bacteria;Other                                                  | 0.24     | 0.27     | 0.58    | 1.28    | 2.29     | 40.93 |
| Verrucomicrobia;Subdivision3;Subdivision3_genera_incertae_sedis | 0.09     | 0.05     | 0.57    | 1.43    | 2.24     | 43.16 |
| ActinoOther                                                     | 0.12     | 0.14     | 0.54    | 1.36    | 2.13     | 45.3  |
| Bacillales                                                      | 0.09     | 0.11     | 0.54    | 1.53    | 2.11     | 47.41 |
| Sphingomonadales                                                | 0.21     | 0.22     | 0.51    | 1.26    | 1.99     | 49.4  |
| BetaproteoOther                                                 | 0.11     | 0.09     | 0.48    | 2.55    | 1.88     | 51.28 |
| Gemmatimonadales                                                | 0.09     | 0.08     | 0.48    | 1.4     | 1.87     | 53.16 |
| Bdellovibrionales                                               | 0.06     | 0.05     | 0.47    | 1.35    | 1.85     | 55.01 |
| Rhodospirillales                                                | 0.11     | 0.14     | 0.47    | 1.33    | 1.84     | 56.86 |
| KtedonoOther                                                    | 0.06     | 0.06     | 0.44    | 1.38    | 1.75     | 58.61 |
| Caulobacterales                                                 | 0.14     | 0.11     | 0.42    | 1.38    | 1.64     | 60.24 |
| Acidobacteria_Gp7;Gp7                                           | 0.05     | 0.01     | 0.41    | 1.75    | 1.61     | 61.85 |
| Acidobacteria_Gp3;Gp3                                           | 0.08     | 0.09     | 0.38    | 1.44    | 1.5      | 63.35 |
| Thermoprotei;Other                                              | 0.05     | 0.05     | 0.35    | 1.46    | 1.37     | 64.72 |
| Acidobacteria_Gp6;Gp6                                           | 0.09     | 0.07     | 0.34    | 1.31    | 1.34     | 66.06 |
| Alteromonadales                                                 | 0.04     | 0.04     | 0.34    | 1.33    | 1.34     | 67.41 |
| Bacteroidetes;Other;Other                                       | 0.06     | 0.04     | 0.34    | 1.16    | 1.34     | 68.75 |

|                               |           |          |         |         |          |       |
|-------------------------------|-----------|----------|---------|---------|----------|-------|
| ProteoOther;Other             | 0.09      | 0.1      | 0.33    | 1.41    | 1.3      | 70.04 |
|                               |           |          |         |         |          |       |
| Groups SB100 & SB50           |           |          |         |         |          |       |
| Average dissimilarity = 29.85 |           |          |         |         |          |       |
|                               |           |          |         |         |          |       |
|                               | Group 100 | Group 50 |         |         |          |       |
| Taxa                          | Av.Abund  | Av.Abund | Av.Diss | Diss/SD | Contrib% | Cum.% |
| Rhodocyclales                 | 0.2       | 0.04     | 1.96    | 0.93    | 6.58     | 6.58  |
| Sphingobacteriales            | 0.27      | 0.45     | 1.84    | 1.55    | 6.16     | 12.74 |
| Xanthomonadales               | 0.15      | 0.26     | 1.27    | 1.71    | 4.24     | 16.98 |
| Actinomycetales               | 0.4       | 0.41     | 1.16    | 1.43    | 3.87     | 20.86 |
| Burkholderiales               | 0.22      | 0.32     | 0.98    | 1.73    | 3.28     | 24.13 |
| Thermoprotei;Other            | 0.14      | 0.08     | 0.95    | 1.04    | 3.2      | 27.33 |
| BetaproteoOther               | 0.15      | 0.08     | 0.89    | 1.11    | 2.98     | 30.32 |
| Sphingomonadales              | 0.24      | 0.19     | 0.86    | 1.06    | 2.89     | 33.21 |
| Bacteria;Other                | 0.36      | 0.29     | 0.83    | 1.63    | 2.77     | 35.98 |
| Pseudomonadales               | 0.06      | 0.12     | 0.71    | 1.04    | 2.39     | 38.37 |
| Acidobacteria_Gp3;Gp3         | 0.13      | 0.14     | 0.66    | 1.7     | 2.22     | 40.59 |
| Rhodospirillales              | 0.15      | 0.17     | 0.57    | 1.69    | 1.91     | 42.5  |
| Hydrogenophilales             | 0.06      | 0.02     | 0.56    | 1.09    | 1.88     | 44.39 |
| KtedonoOther                  | 0.08      | 0.1      | 0.53    | 1.83    | 1.79     | 46.18 |
| Bacteroidetes;Other;Other     | 0.04      | 0.09     | 0.52    | 1.7     | 1.74     | 47.92 |
| Solirubrobacterales           | 0.18      | 0.14     | 0.51    | 1.45    | 1.7      | 49.62 |
| Rhizobiales                   | 0.17      | 0.2      | 0.48    | 2.15    | 1.61     | 51.23 |
| Bdellovibrionales             | 0.04      | 0.08     | 0.48    | 1.26    | 1.6      | 52.82 |
| Bacillales                    | 0.11      | 0.11     | 0.48    | 1.39    | 1.59     | 54.41 |
| Rhodobacterales               | 0.03      | 0.07     | 0.46    | 1.29    | 1.56     | 55.97 |
| GammaproteoOther              | 0.07      | 0.06     | 0.43    | 1.22    | 1.44     | 57.41 |
| Flavobacteriales              | 0.05      | 0.07     | 0.43    | 1.65    | 1.43     | 58.84 |
| Acidobacteria_Gp2;Gp2         | 0.04      | 0        | 0.42    | 0.4     | 1.41     | 60.25 |
| Acidobacteria_Gp4;Gp4         | 0.05      | 0.03     | 0.41    | 1.68    | 1.39     | 61.64 |
| Ktedonobacterales             | 0.04      | 0.04     | 0.41    | 1.7     | 1.38     | 63.01 |
| Acidobacteria_Gp3;Other       | 0.07      | 0.06     | 0.41    | 1.91    | 1.36     | 64.37 |
| Chloroplast                   | 0.02      | 0.04     | 0.39    | 1.17    | 1.32     | 65.69 |
| Caulobacterales               | 0.08      | 0.11     | 0.39    | 1.38    | 1.31     | 67    |
| ActinoOther                   | 0.15      | 0.11     | 0.39    | 1.76    | 1.29     | 68.29 |

|                                                                 |          |          |         |         |          |       |
|-----------------------------------------------------------------|----------|----------|---------|---------|----------|-------|
| Gemmatimonadales                                                | 0.09     | 0.11     | 0.37    | 1.41    | 1.24     | 69.54 |
| ProteoOther;Other                                               | 0.1      | 0.07     | 0.37    | 1.34    | 1.24     | 70.78 |
|                                                                 |          |          |         |         |          |       |
| Groups SB10 & SB50                                              |          |          |         |         |          |       |
| Average dissimilarity = 24.56                                   |          |          |         |         |          |       |
|                                                                 |          |          |         |         |          |       |
|                                                                 | Group 10 | Group 50 |         |         |          |       |
| Taxa                                                            | Av.Abund | Av.Abund | Av.Diss | Diss/SD | Contrib% | Cum.% |
| Xanthomonadales                                                 | 0.38     | 0.26     | 1.4     | 1.43    | 5.69     | 5.69  |
| Sphingobacteriales                                              | 0.39     | 0.45     | 1.1     | 1.27    | 4.48     | 10.17 |
| Rhodobacterales                                                 | 0.15     | 0.07     | 0.92    | 1.36    | 3.75     | 13.92 |
| Actinomycetales                                                 | 0.39     | 0.41     | 0.9     | 1.3     | 3.67     | 17.59 |
| Ohtaekwangia                                                    | 0.13     | 0.06     | 0.77    | 1.17    | 3.12     | 20.71 |
| Acidobacteria_Gp3;Gp3                                           | 0.08     | 0.14     | 0.69    | 1.71    | 2.82     | 23.54 |
| Solirubrobacterales                                             | 0.13     | 0.14     | 0.63    | 1.59    | 2.58     | 26.11 |
| Pseudomonadales                                                 | 0.09     | 0.12     | 0.63    | 1.13    | 2.57     | 28.68 |
| Bacteria;Other                                                  | 0.24     | 0.29     | 0.63    | 1.84    | 2.56     | 31.24 |
| Rhodospirillales                                                | 0.11     | 0.17     | 0.6     | 1.83    | 2.44     | 33.68 |
| Burkholderiales                                                 | 0.31     | 0.32     | 0.52    | 1.45    | 2.13     | 35.81 |
| Bacillales                                                      | 0.09     | 0.11     | 0.51    | 1.37    | 2.06     | 37.87 |
| Thermoprotei;Other                                              | 0.05     | 0.08     | 0.5     | 1.55    | 2.02     | 39.89 |
| Hydrogenophilales                                               | 0.06     | 0.02     | 0.5     | 1.01    | 2.02     | 41.91 |
| KtedonoOther                                                    | 0.06     | 0.1      | 0.5     | 1.37    | 2.02     | 43.93 |
| Bdellovibrionales                                               | 0.06     | 0.08     | 0.49    | 1.32    | 1.99     | 45.92 |
| Caulobacterales                                                 | 0.14     | 0.11     | 0.49    | 1.43    | 1.98     | 47.9  |
| Flavobacteriales                                                | 0.02     | 0.07     | 0.47    | 1.75    | 1.92     | 49.82 |
| Rhodocyclales                                                   | 0.06     | 0.04     | 0.46    | 1.07    | 1.88     | 51.7  |
| Verrucomicrobia;Subdivision3;Subdivision3_genera_incertae_sedis | 0.09     | 0.07     | 0.45    | 1.56    | 1.82     | 53.52 |
| Acidobacteria_Gp6;Gp6                                           | 0.09     | 0.05     | 0.44    | 1.56    | 1.79     | 55.31 |
| Rhizobiales                                                     | 0.18     | 0.2      | 0.44    | 2.09    | 1.78     | 57.09 |
| Chloroplast                                                     | 0        | 0.04     | 0.41    | 1.05    | 1.68     | 58.77 |
| Sphingomonadales                                                | 0.21     | 0.19     | 0.4     | 1.17    | 1.65     | 60.41 |
| ActinoOther                                                     | 0.12     | 0.11     | 0.39    | 1.33    | 1.58     | 61.99 |
| GammaproteoOther                                                | 0.09     | 0.06     | 0.38    | 1.53    | 1.55     | 63.55 |
| Acidobacteria_Gp3;Other                                         | 0.03     | 0.06     | 0.38    | 1.49    | 1.55     | 65.1  |

|                               |          |          |         |         |          |       |
|-------------------------------|----------|----------|---------|---------|----------|-------|
| ProteoOther;Other             | 0.09     | 0.07     | 0.36    | 1.37    | 1.47     | 66.57 |
| Bacteroidetes;Other;Other     | 0.06     | 0.09     | 0.36    | 1.39    | 1.46     | 68.03 |
| Gemmatimonadales              | 0.09     | 0.11     | 0.35    | 1.4     | 1.44     | 69.46 |
| Acidobacteria_Gp4;Gp4         | 0.02     | 0.03     | 0.35    | 1.6     | 1.42     | 70.89 |
|                               |          |          |         |         |          |       |
| Groups SB25 & SB50            |          |          |         |         |          |       |
| Average dissimilarity = 24.24 |          |          |         |         |          |       |
|                               |          |          |         |         |          |       |
|                               | Group 25 | Group 50 |         |         |          |       |
| Taxa                          | Av.Abund | Av.Abund | Av.Diss | Diss/SD | Contrib% | Cum.% |
| Sphingobacteriales            | 0.36     | 0.45     | 1.47    | 1.45    | 6.07     | 6.07  |
| Hydrogenophilales             | 0.1      | 0.02     | 0.95    | 0.7     | 3.92     | 9.99  |
| Actinomycetales               | 0.44     | 0.41     | 0.91    | 1.38    | 3.77     | 13.76 |
| Xanthomonadales               | 0.32     | 0.26     | 0.82    | 1.2     | 3.39     | 17.15 |
| Pseudomonadales               | 0.12     | 0.12     | 0.82    | 1.34    | 3.37     | 20.52 |
| Rhodocyclales                 | 0.08     | 0.04     | 0.71    | 0.86    | 2.93     | 23.46 |
| Solirubrobacterales           | 0.14     | 0.14     | 0.67    | 1.52    | 2.77     | 26.23 |
| Burkholderiales               | 0.31     | 0.32     | 0.61    | 1.54    | 2.52     | 28.75 |
| Ohtaekwangia                  | 0.07     | 0.06     | 0.59    | 1.68    | 2.42     | 31.17 |
| GammaproteoOther              | 0.1      | 0.06     | 0.58    | 0.79    | 2.38     | 33.55 |
| Acidobacteria_Gp3;Gp3         | 0.09     | 0.14     | 0.57    | 1.46    | 2.36     | 35.9  |
| Bacteroidetes;Other;Other     | 0.04     | 0.09     | 0.51    | 1.48    | 2.11     | 38.01 |
| Gemmatimonadales              | 0.08     | 0.11     | 0.49    | 1.28    | 2.04     | 40.05 |
| Bacteria;Other                | 0.27     | 0.29     | 0.49    | 2.05    | 2.02     | 42.07 |
| Bdellovibrionales             | 0.05     | 0.08     | 0.48    | 1.27    | 1.96     | 44.03 |
| Sphingomonadales              | 0.22     | 0.19     | 0.47    | 1.14    | 1.96     | 45.99 |
| Rhodospirillales              | 0.14     | 0.17     | 0.47    | 1.47    | 1.95     | 47.93 |
| ActinoOther                   | 0.14     | 0.11     | 0.45    | 1.42    | 1.87     | 49.8  |
| Rhizobiales                   | 0.18     | 0.2      | 0.45    | 1.38    | 1.86     | 51.65 |
| Flavobacteriales              | 0.03     | 0.07     | 0.44    | 1.47    | 1.82     | 53.47 |
| KtedonoOther                  | 0.06     | 0.1      | 0.43    | 1.12    | 1.79     | 55.26 |
| Bacillales                    | 0.11     | 0.11     | 0.43    | 1.39    | 1.78     | 57.04 |
| Chloroplast                   | 0        | 0.04     | 0.43    | 1.04    | 1.78     | 58.82 |
| Acidobacteria_Gp3;Other       | 0.02     | 0.06     | 0.43    | 1.57    | 1.77     | 60.58 |
| ProteoOther;Other             | 0.1      | 0.07     | 0.39    | 1.52    | 1.61     | 62.19 |
| Rhodobacterales               | 0.08     | 0.07     | 0.39    | 1.32    | 1.6      | 63.8  |

|                                                                 |           |          |         |         |          |       |
|-----------------------------------------------------------------|-----------|----------|---------|---------|----------|-------|
| Thermoprotei;Other                                              | 0.05      | 0.08     | 0.38    | 1.45    | 1.56     | 65.36 |
| Verrucomicrobia;Subdivision3;Subdivision3_genera_incertae_sedis | 0.05      | 0.07     | 0.36    | 1.39    | 1.5      | 66.85 |
| Alteromonadales                                                 | 0.04      | 0.03     | 0.35    | 1.29    | 1.45     | 68.3  |
| Caulobacterales                                                 | 0.11      | 0.11     | 0.33    | 2.01    | 1.36     | 69.66 |
| BetaproteoOther                                                 | 0.09      | 0.08     | 0.31    | 0.87    | 1.3      | 70.96 |
|                                                                 |           |          |         |         |          |       |
| Groups SB100 & R                                                |           |          |         |         |          |       |
| Average dissimilarity = 45.58                                   |           |          |         |         |          |       |
|                                                                 |           |          |         |         |          |       |
|                                                                 | Group 100 | Group R  |         |         |          |       |
| Taxa                                                            | Av.Abund  | Av.Abund | Av.Diss | Diss/SD | Contrib% | Cum.% |
| Bacteria;Other                                                  | 0.36      | 0.67     | 3.4     | 3.72    | 7.46     | 7.46  |
| Rhodocyclales                                                   | 0.2       | 0.1      | 2.22    | 1.19    | 4.88     | 12.34 |
| Actinomycetales                                                 | 0.4       | 0.2      | 2.22    | 1.63    | 4.88     | 17.21 |
| Sphingomonadales                                                | 0.24      | 0.06     | 1.96    | 1.61    | 4.29     | 21.51 |
| Burkholderiales                                                 | 0.22      | 0.04     | 1.95    | 3.29    | 4.28     | 25.79 |
| Sphingobacteriales                                              | 0.27      | 0.1      | 1.84    | 2.04    | 4.03     | 29.82 |
| Xanthomonadales                                                 | 0.15      | 0        | 1.61    | 2.37    | 3.53     | 33.36 |
| Thermoprotei;Other                                              | 0.14      | 0.21     | 1.33    | 1.54    | 2.91     | 36.27 |
| Solirubrobacterales                                             | 0.18      | 0.27     | 1.29    | 1.29    | 2.84     | 39.11 |
| Ktedonobacterales                                               | 0.04      | 0.16     | 1.28    | 2.04    | 2.81     | 41.91 |
| Chloroflexi;Other;Other                                         | 0.04      | 0.14     | 1.12    | 2.46    | 2.45     | 44.37 |
| BetaproteoOther                                                 | 0.15      | 0.07     | 1.07    | 1.2     | 2.34     | 46.71 |
| KtedonoOther                                                    | 0.08      | 0.17     | 1.05    | 1.54    | 2.29     | 49    |
| Acidobacteria_Gp3;Gp3                                           | 0.13      | 0.19     | 1.02    | 1.47    | 2.25     | 51.25 |
| ActinoOther                                                     | 0.15      | 0.23     | 0.96    | 1.38    | 2.1      | 53.35 |
| Bacillales                                                      | 0.11      | 0.05     | 0.87    | 1.65    | 1.91     | 55.26 |
| Acidobacteria_Gp3;Other                                         | 0.07      | 0.11     | 0.79    | 1.38    | 1.74     | 56.99 |
| partobacteria_genera_incertae_sedis                             | 0.04      | 0.1      | 0.75    | 1.14    | 1.65     | 58.64 |
| Unclassified                                                    | 0.02      | 0.08     | 0.71    | 1.38    | 1.56     | 60.2  |
| Rhodospirillales                                                | 0.15      | 0.11     | 0.7     | 1.44    | 1.54     | 61.74 |
| Caulobacterales                                                 | 0.08      | 0.01     | 0.67    | 2.34    | 1.47     | 63.22 |
| Hydrogenophilales                                               | 0.06      | 0        | 0.66    | 1.05    | 1.46     | 64.68 |
| Gemmatimonadales                                                | 0.09      | 0.03     | 0.66    | 1.69    | 1.45     | 66.12 |



|                                                                 |          |          |         |         |          |       |
|-----------------------------------------------------------------|----------|----------|---------|---------|----------|-------|
| GammaproteoOther                                                | 0.07     | 0.01     | 0.63    | 1.2     | 1.38     | 67.5  |
| Verrucomicrobia;Subdivision3;Subdivision3_genera_incertae_sedis | 0.06     | 0.01     | 0.61    | 1.93    | 1.34     | 68.84 |
| Acidobacteria_Gp2;Gp2                                           | 0.04     | 0.02     | 0.59    | 0.57    | 1.3      | 70.14 |
|                                                                 |          |          |         |         |          |       |
| Groups SB10 & R                                                 |          |          |         |         |          |       |
| Average dissimilarity = 56.23                                   |          |          |         |         |          |       |
|                                                                 |          |          |         |         |          |       |
|                                                                 | Group 10 | Group R  |         |         |          |       |
| Taxa                                                            | Av.Abund | Av.Abund | Av.Diss | Diss/SD | Contrib% | Cum.% |
| Bacteria;Other                                                  | 0.24     | 0.67     | 4.7     | 5.82    | 8.35     | 8.35  |
| Xanthomonadales                                                 | 0.38     | 0        | 4.17    | 3.58    | 7.42     | 15.77 |
| Sphingobacteriales                                              | 0.39     | 0.1      | 3.21    | 2.71    | 5.7      | 21.47 |
| Burkholderiales                                                 | 0.31     | 0.04     | 3.03    | 3.77    | 5.39     | 26.86 |
| Actinomycetales                                                 | 0.39     | 0.2      | 2.07    | 2.07    | 3.67     | 30.53 |
| Thermoprotei;Other                                              | 0.05     | 0.21     | 1.75    | 2.26    | 3.11     | 33.65 |
| Solirubrobacterales                                             | 0.13     | 0.27     | 1.71    | 1.39    | 3.04     | 36.69 |
| Rhodobacterales                                                 | 0.15     | 0        | 1.61    | 2.07    | 2.86     | 39.55 |
| Sphingomonadales                                                | 0.21     | 0.06     | 1.57    | 2.35    | 2.79     | 42.35 |
| Ktedonobacterales                                               | 0.02     | 0.16     | 1.49    | 2.76    | 2.64     | 44.99 |
| Caulobacterales                                                 | 0.14     | 0.01     | 1.42    | 3.1     | 2.53     | 47.52 |
| Ohtaekwangia                                                    | 0.13     | 0        | 1.37    | 1.68    | 2.44     | 49.96 |
| Acidobacteria_Gp3;Gp3                                           | 0.08     | 0.19     | 1.31    | 1.67    | 2.32     | 52.29 |
| ActinoOther                                                     | 0.12     | 0.23     | 1.26    | 1.53    | 2.23     | 54.52 |
| Chloroflexi;Other;Other                                         | 0.03     | 0.14     | 1.23    | 2.92    | 2.2      | 56.71 |
| KtedonoOther                                                    | 0.06     | 0.17     | 1.22    | 1.87    | 2.18     | 58.89 |
| Acidobacteria_Gp3;Other                                         | 0.03     | 0.11     | 1.01    | 1.5     | 1.8      | 60.69 |
| Pseudomonadales                                                 | 0.09     | 0.01     | 0.93    | 2.5     | 1.65     | 62.34 |
| Verrucomicrobia;Subdivision3;Subdivision3_genera_incertae_sedis | 0.09     | 0.01     | 0.92    | 1.97    | 1.64     | 63.98 |
| Acidobacteria_Gp6;Gp6                                           | 0.09     | 0.01     | 0.89    | 2.79    | 1.58     | 65.56 |
| GammaproteoOther                                                | 0.09     | 0.01     | 0.87    | 2.95    | 1.54     | 67.11 |
| Unclassified                                                    | 0        | 0.08     | 0.86    | 1.69    | 1.53     | 68.63 |
| Rhodocyclales                                                   | 0.06     | 0.1      | 0.84    | 1.08    | 1.5      | 70.13 |
|                                                                 |          |          |         |         |          |       |

|                                     |          |          |         |         |          |       |
|-------------------------------------|----------|----------|---------|---------|----------|-------|
|                                     |          |          |         |         |          |       |
| Groups SB25 & R                     |          |          |         |         |          |       |
| Average dissimilarity = 53.55       |          |          |         |         |          |       |
|                                     |          |          |         |         |          |       |
|                                     | Group 25 | Group R  |         |         |          |       |
| Taxa                                | Av.Abund | Av.Abund | Av.Diss | Diss/SD | Contrib% | Cum.% |
| Bacteria;Other                      | 0.27     | 0.67     | 4.48    | 5.71    | 8.36     | 8.36  |
| Xanthomonadales                     | 0.32     | 0        | 3.5     | 5.43    | 6.53     | 14.89 |
| Burkholderiales                     | 0.31     | 0.04     | 3.01    | 3.23    | 5.62     | 20.51 |
| Sphingobacteriales                  | 0.36     | 0.1      | 2.94    | 1.88    | 5.48     | 25.99 |
| Actinomycetales                     | 0.44     | 0.2      | 2.72    | 2.55    | 5.07     | 31.06 |
| Thermoprotei;Other                  | 0.05     | 0.21     | 1.7     | 2.42    | 3.17     | 34.23 |
| Sphingomonadales                    | 0.22     | 0.06     | 1.69    | 2.27    | 3.15     | 37.38 |
| Solirubrobacterales                 | 0.14     | 0.27     | 1.67    | 1.35    | 3.11     | 40.49 |
| Ktedonobacterales                   | 0.02     | 0.16     | 1.52    | 2.97    | 2.83     | 43.32 |
| Chloroflexi;Other;Other             | 0.03     | 0.14     | 1.26    | 2.49    | 2.34     | 45.67 |
| Pseudomonadales                     | 0.12     | 0.01     | 1.25    | 1.61    | 2.34     | 48.01 |
| KtedonoOther                        | 0.06     | 0.17     | 1.23    | 1.98    | 2.29     | 50.29 |
| Acidobacteria_Gp3;Gp3               | 0.09     | 0.19     | 1.21    | 1.58    | 2.25     | 52.55 |
| ActinoOther                         | 0.14     | 0.23     | 1.15    | 1.41    | 2.15     | 54.69 |
| Acidobacteria_Gp3;Other             | 0.02     | 0.11     | 1.07    | 1.52    | 2        | 56.7  |
| Caulobacterales                     | 0.11     | 0.01     | 1.04    | 3.32    | 1.95     | 58.65 |
| Hydrogenophilales                   | 0.1      | 0        | 1.03    | 0.65    | 1.92     | 60.56 |
| Rhodocyclales                       | 0.08     | 0.1      | 1.02    | 1.07    | 1.91     | 62.47 |
| partobacteria_genera_incertae_sedis | 0.02     | 0.1      | 0.93    | 1.22    | 1.74     | 64.21 |
| GammaproteoOther                    | 0.1      | 0.01     | 0.92    | 1.03    | 1.71     | 65.92 |
| Rhodobacterales                     | 0.08     | 0        | 0.88    | 2.63    | 1.65     | 67.57 |
| Bacillales                          | 0.11     | 0.05     | 0.84    | 1.69    | 1.56     | 69.13 |
| Unclassified                        | 0.01     | 0.08     | 0.83    | 1.58    | 1.56     | 70.69 |
|                                     |          |          |         |         |          |       |

|                                     |          |          |         |         |          |       |
|-------------------------------------|----------|----------|---------|---------|----------|-------|
|                                     |          |          |         |         |          |       |
| Groups SB50 & R                     |          |          |         |         |          |       |
| Average dissimilarity = 50.10       |          |          |         |         |          |       |
|                                     |          |          |         |         |          |       |
|                                     | Group 50 | Group R  |         |         |          |       |
| Taxa                                | Av.Abund | Av.Abund | Av.Diss | Diss/SD | Contrib% | Cum.% |
| Bacteria;Other                      | 0.29     | 0.67     | 4.13    | 8.22    | 8.25     | 8.25  |
| Sphingobacteriales                  | 0.45     | 0.1      | 3.82    | 3.03    | 7.62     | 15.87 |
| Burkholderiales                     | 0.32     | 0.04     | 3.02    | 4.48    | 6.02     | 21.89 |
| Xanthomonadales                     | 0.26     | 0        | 2.83    | 3.63    | 5.65     | 27.54 |
| Actinomycetales                     | 0.41     | 0.2      | 2.28    | 2.61    | 4.55     | 32.09 |
| Solirubrobacterales                 | 0.14     | 0.27     | 1.55    | 1.31    | 3.09     | 35.18 |
| Sphingomonadales                    | 0.19     | 0.06     | 1.37    | 2.4     | 2.74     | 37.92 |
| Thermoprotei;Other                  | 0.08     | 0.21     | 1.33    | 1.93    | 2.65     | 40.57 |
| ActinoOther                         | 0.11     | 0.23     | 1.27    | 1.61    | 2.54     | 43.12 |
| Ktedonobacterales                   | 0.04     | 0.16     | 1.24    | 2.49    | 2.48     | 45.6  |
| Pseudomonadales                     | 0.12     | 0.01     | 1.21    | 1.53    | 2.43     | 48.03 |
| Chloroflexi;Other;Other             | 0.03     | 0.14     | 1.16    | 2.97    | 2.31     | 50.34 |
| Caulobacterales                     | 0.11     | 0.01     | 1       | 2.32    | 2        | 52.34 |
| Gemmatimonadales                    | 0.11     | 0.03     | 0.92    | 2.84    | 1.84     | 54.18 |
| KtedonoOther                        | 0.1      | 0.17     | 0.87    | 1.63    | 1.73     | 55.91 |
| Bdellovibrionales                   | 0.08     | 0        | 0.86    | 2.09    | 1.71     | 57.63 |
| Bacillales                          | 0.11     | 0.05     | 0.85    | 1.7     | 1.69     | 59.32 |
| Acidobacteria_Gp3;Gp3               | 0.14     | 0.19     | 0.85    | 1.41    | 1.69     | 61.01 |
| Bacteroidetes;Other;Other           | 0.09     | 0.01     | 0.84    | 2.68    | 1.67     | 62.68 |
| Rhodocyclales                       | 0.04     | 0.1      | 0.83    | 0.99    | 1.66     | 64.34 |
| Rhizobiales                         | 0.2      | 0.14     | 0.79    | 1.7     | 1.58     | 65.93 |
| Unclassified                        | 0.01     | 0.08     | 0.76    | 1.47    | 1.51     | 67.44 |
| Acidobacteria_Gp3;Other             | 0.06     | 0.11     | 0.75    | 1.37    | 1.49     | 68.93 |
| partobacteria_genera_incertae_sedis | 0.04     | 0.1      | 0.73    | 1.08    | 1.45     | 70.38 |
